# Supplementary material for: Characterization of reference materials for in situ U–Pb dating of columbite group minerals by LA-ICP-MS
Source: Royal Society of Chemistry journal article supplement (doi:10.1039/d3ja00162h), 2023-01-01
Supplement: d3ja00162h1.xlsx [file d3ja00162h1.xlsx]

## Sheet: Sheet1
Table S1 Individual major element analysis of investigated samples in this study (% m/m).
Sample	WO3	Nb2O5	Ta2O5	TiO2	SnO2	Sc2O3	FeO	MnO	Total	Mn/(Fe+Mn)	Ta/(Nb+Ta)
CT1a-1	n.d.	7.35	74.88	0.83	b.d.	n.d.	14.52	0.86	98.44	0.0565928	0.859711
CT1a-2	n.d.	7.16	74.04	0.82	0.02	n.d.	14.58	0.75	97.37	0.0495196	0.8615
CT1a-3	n.d.	6.88	75.03	0.83	0.12	n.d.	14.46	0.89	98.21	0.0586798	0.867723
CT1a-4	n.d.	7.02	74.13	0.81	b.d.	n.d.	14.6	0.95	97.51	0.0618277	0.863982
CT1a-5	n.d.	7.16	74.41	0.77	b.d.	n.d.	14.54	0.81	97.69	0.0534088	0.862093
CT1a-6	n.d.	6.89	74.24	0.79	b.d.	n.d.	14.55	0.82	97.29	0.0539974	0.866335
CT1a-7	n.d.	7.19	75.25	0.79	0.02	n.d.	14.81	0.73	98.79	0.0475489	0.862929
CT1a-8	n.d.	7.32	74.68	0.79	b.d.	n.d.	14.63	0.62	98.04	0.0411553	0.859882
CT1a-9	n.d.	6.82	75.28	0.77	b.d.	n.d.	14.47	0.87	98.21	0.0573995	0.869104
CT1a-10	n.d.	7.07	75.14	0.8	0.1	n.d.	14.82	0.9	98.83	0.057943	0.864736
CT1a-11	n.d.	7.1	74.49	0.8	0.02	n.d.	14.41	0.88	97.7	0.0582485	0.863218
CT1a-12	n.d.	7.05	74.92	0.76	b.d.	n.d.	14.65	0.8	98.18	0.0524087	0.864725
CT1a-13	n.d.	7.06	74.7	0.79	0.04	n.d.	14.6	0.85	98.04	0.0556819	0.864214
CT1a-14	n.d.	6.94	74.79	0.77	0.03	n.d.	14.53	0.86	97.92	0.056556	0.866353
CT1a-15	n.d.	6.95	75.08	0.79	0.09	n.d.	14.64	0.91	98.46	0.0592264	0.866634
CT1a-16	n.d.	7.24	74.29	0.83	0.12	n.d.	14.6	0.94	98.02	0.0612167	0.860574
CT1a-17	n.d.	6.9	74.85	0.76	b.d.	n.d.	14.39	0.92	97.82	0.0608146	0.867113
CT1a-18	n.d.	7.01	75.41	0.76	b.d.	n.d.	14.35	0.8	98.33	0.0534458	0.866147
CT1a-19	n.d.	7.32	74.3	0.84	0.04	n.d.	14.69	0.94	98.13	0.0608645	0.859266
CT1a-20	n.d.	7.15	74.53	0.83	b.d.	n.d.	14.53	0.79	97.83	0.0521929	0.862451
CT3a-1	n.d.	4.75	76.64	0.63	0.03	n.d.	14.26	0.71	97.02	0.0480068	0.906589
CT3a-2	n.d.	6.34	75.58	0.69	0.05	n.d.	14.41	0.63	97.7	0.0424023	0.877613
CT3a-3	n.d.	6.45	74.78	0.56	b.d.	n.d.	14.31	1.07	97.17	0.0703996	0.874591
CT3a-4	n.d.	6.33	74.72	0.58	b.d.	n.d.	14.46	0.98	97.07	0.0642326	0.87655
CT3a-5	n.d.	6.47	74.96	0.59	0.04	n.d.	14.16	1.05	97.27	0.0698563	0.874515
CT3a-6	n.d.	6.13	76.07	0.61	0.1	n.d.	14.38	0.84	98.13	0.0558583	0.88186
CT3a-7	n.d.	6.44	75.21	0.59	0.01	n.d.	14.35	0.9	97.5	0.0597275	0.875388
CT3a-8	n.d.	6.48	75.23	0.59	b.d.	n.d.	14.26	0.99	97.55	0.0656953	0.87474
CT3a-9	n.d.	6.38	75.07	0.67	0.09	n.d.	14.64	0.95	97.8	0.0616692	0.876204
CT3a-10	n.d.	6.3	74.74	0.67	b.d.	n.d.	14.07	1.01	96.79	0.0677762	0.877092
CT3a-11	n.d.	6.29	75.45	0.68	0.04	n.d.	14.51	1.04	98.01	0.0676801	0.878277
CT3a-12	n.d.	6.43	75.92	0.69	0.08	n.d.	14.41	0.83	98.36	0.0551214	0.876578
CT3a-13	n.d.	6.63	75.2	0.7	0.06	n.d.	14.55	0.98	98.12	0.0638607	0.872167
CT3a-14	n.d.	6.44	76.21	0.71	0.08	n.d.	14.5	0.97	98.91	0.0634545	0.876822
CT3a-15	n.d.	6.2	76.25	0.72	0.06	n.d.	14.5	0.87	98.6	0.0572876	0.88092
CT3a-16	n.d.	6.29	75.29	0.69	b.d.	n.d.	14.37	0.99	97.63	0.0652252	0.87805
CT3a-17	n.d.	6.32	74.83	0.71	b.d.	n.d.	14.47	0.9	97.23	0.0592615	0.87688
CT3a-18	n.d.	6.33	75.56	0.67	b.d.	n.d.	14.3	0.99	97.85	0.0655235	0.877754
CT3a-19	n.d.	6.26	75.2	0.71	b.d.	n.d.	14.25	0.98	97.4	0.0651175	0.878433
CT3a-20	n.d.	5.99	75.15	0.67	b.d.	n.d.	14.27	0.9	96.98	0.0600422	0.882995
CT3a-21	n.d.	6.21	75.51	0.62	b.d.	n.d.	14.19	0.93	97.46	0.062247	0.879723
CT3a-22	n.d.	6	76.53	0.66	0.03	n.d.	14.15	1.12	98.49	0.0742166	0.884692
Burangaa-1	n.d.	64.29	11.82	0.75	0.15	n.d.	10.73	9.63	97.37	0.476161	0.0995797
Burangaa-2	n.d.	64.82	11.84	0.7	0.07	n.d.	10.43	9.9	97.76	0.490147	0.0989966
Burangaa-3	n.d.	63.07	11.34	0.7	0.18	n.d.	10.48	9.81	95.58	0.48667	0.0975981
Burangaa-4	n.d.	64.44	11.57	0.73	0.3	n.d.	10.47	9.9	97.41	0.48919	0.097474
Burangaa-5	n.d.	64.97	11.85	0.68	0.22	n.d.	10.68	9.92	98.32	0.484733	0.0988658
Burangaa-6	n.d.	64.34	11.19	0.74	0.17	n.d.	10.6	10	97.04	0.488618	0.0947085
Burangaa-7	n.d.	64.36	11.18	0.71	0.21	n.d.	10.49	9.78	96.73	0.485666	0.0946052
Burangaa-8	n.d.	64.31	12.05	0.71	0.25	n.d.	10.72	9.61	97.65	0.475875	0.101293
Burangaa-9	n.d.	64.44	11.31	0.73	0.27	n.d.	10.69	9.88	97.32	0.48349	0.0954927
Burangaa-10	n.d.	64.34	11.46	0.72	0.31	n.d.	10.57	10.07	97.47	0.491069	0.0967725
Burangaa-11	n.d.	64.53	11.9	0.73	0.1	n.d.	10.45	9.99	97.7	0.49193	0.0998507
Burangaa-12	n.d.	64.72	11.93	0.77	0.31	n.d.	11.06	9.78	98.57	0.472462	0.0998128
Burangaa-13	n.d.	64.31	11.6	0.74	0.09	n.d.	10.83	9.99	97.56	0.483006	0.0978802
Burangaa-14	n.d.	64.11	11.76	0.74	0.22	n.d.	10.61	9.8	97.24	0.483336	0.0993749
Burangaa-15	n.d.	64.22	11.6	0.75	0.21	n.d.	10.54	9.82	97.14	0.485498	0.098004
Burangaa-16	n.d.	66.08	10.91	0.65	0.15	n.d.	11.04	9.53	98.36	0.466464	0.0903409
Burangaa-17	n.d.	64.29	11.82	0.75	0.15	n.d.	10.73	9.63	97.37	0.476161	0.0995797
Burangaa-18	n.d.	64.82	11.84	0.7	0.07	n.d.	10.43	9.9	97.76	0.490147	0.0989966
Burangaa-19	n.d.	63.07	11.34	0.7	0.18	n.d.	10.48	9.81	95.58	0.48667	0.0975981
Burangaa-20	n.d.	64.44	11.57	0.73	0.3	n.d.	10.47	9.9	97.41	0.48919	0.097474
Rongia-1	n.d.	66.22	11.49	0.17	0.03	n.d.	13.8	6.84	98.55	0.334223	0.0945076
Rongia-2	n.d.	57.76	11.12	0.22	0.1	n.d.	14.53	5.68	89.41	0.283629	0.103786
Rongia-3	n.d.	66.16	11.69	0.16	b.d.	n.d.	13.6	6.88	98.49	0.338784	0.0960735
Rongia-4	n.d.	66.48	10.85	0.2	b.d.	n.d.	13.92	6.63	98.08	0.325417	0.0893963
Rongia-5	n.d.	65.72	11.02	0.21	b.d.	n.d.	14.14	6.59	97.68	0.320664	0.0916224
Rongia-6	n.d.	66.17	10.84	0.19	b.d.	n.d.	14.31	6.3	97.81	0.308386	0.0897022
Rongia-7	n.d.	66.23	10.97	0.22	0.08	n.d.	14.05	6.38	97.93	0.315027	0.0906057
Rongia-8	n.d.	66.15	11.03	0.23	b.d.	n.d.	14.31	6.45	98.17	0.313427	0.0911562
Rongia-9	n.d.	65.69	10.77	0.22	b.d.	n.d.	14.26	6.41	97.35	0.312842	0.0897677
Rongia-10	n.d.	66.3	10.8	0.21	b.d.	n.d.	14.08	6.35	97.74	0.313551	0.0892411
Rongia-11	n.d.	66.14	10.88	0.24	0.03	n.d.	14.06	6.25	97.6	0.310449	0.0900405
Rongia-12	n.d.	66.2	10.84	0.23	0.05	n.d.	14	6.24	97.56	0.311022	0.0896652
Rongia-13	n.d.	65.52	10.87	0.25	0.11	n.d.	14.45	6.25	97.45	0.304623	0.0907393
Rongia-14	n.d.	66.43	10.84	0.26	b.d.	n.d.	13.85	6.67	98.05	0.327848	0.0893825
Rongia-15	n.d.	65.96	10.66	0.23	b.d.	n.d.	14.24	6.4	97.49	0.312808	0.0886006
Rongia-16	n.d.	66.07	11.12	0.25	b.d.	n.d.	14.08	6.36	97.88	0.31389	0.0919327
Rongia-17	n.d.	66.15	10.95	0.22	0.07	n.d.	14.24	6.49	98.12	0.315818	0.0905549
Rongia-18	n.d.	66.15	10.83	0.22	b.d.	n.d.	13.98	6.54	97.72	0.321485	0.0896515
Rongia-19	n.d.	65.78	10.93	0.24	b.d.	n.d.	14.35	6.59	97.89	0.317461	0.0908668
Rongia-20	n.d.	66.31	10.73	0.22	0.04	n.d.	14.64	6.63	98.57	0.314445	0.0887018
Coltan139b-1	0.79	61.19	12.5	3.51	0.62	0.9	10.36	9	98.87	0.468045	0.109433
Coltan139b-2	0.99	61.43	12.46	3.39	0.58	0.89	10.5	8.81	99.05	0.459401	0.108741
Coltan139b-3	0.79	61.93	12.61	3.59	0.64	0.88	10.23	8.83	99.5	0.466441	0.109116
Coltan139b-4	0.77	62.75	12.85	3.38	0.66	0.9	10.1	9.19	100.6	0.47959	0.109671
Coltan139b-5	0.7	62.69	12.76	3.23	0.61	0.87	10.27	9.19	100.32	0.475425	0.109079
Coltan139b-6	0.79	62.52	12.61	3.37	0.6	0.85	10.56	9.01	100.31	0.463563	0.108197
Coltan139b-7	0.89	61.73	12.39	3.26	0.67	0.83	10.2	8.89	98.86	0.468858	0.107727
Coltan139b-8	0.59	62.37	12.6	2.19	0.6	0.89	10.83	8.85	98.92	0.452848	0.108353
Coltan139b-9	0.54	63.02	12.63	2.05	0.51	0.87	10.23	8.87	98.72	0.467566	0.107583
Coltan139b-10	0.65	63.72	12.45	3.45	0.57	0.86	9.65	9.05	100.4	0.487138	0.105169
Coltan139b-11	0.96	63.36	12.52	3.46	0.46	0.85	10.32	9.14	101.07	0.472854	0.106234
Coltan139b-12	0.45	63.71	12.79	3.44	0.47	0.9	10.42	9.11	101.29	0.469632	0.107746
Coltan139b-13	0.62	61.62	12.78	3.33	0.66	0.89	10.44	9.33	99.67	0.475101	0.110918
Coltan139b-14	0.72	63.47	12.84	3.52	0.57	0.89	10.58	9.1	101.69	0.465565	0.108487
Coltan139b-15	0.78	63.43	12.79	3.52	0.64	0.89	10.58	8.59	101.22	0.451247	0.108171
Coltan139b-16	0.67	61.62	12.93	3.45	0.67	0.88	10.61	8.93	99.76	0.460173	0.112074
Coltan139b-17	0.81	62.89	12.68	3.65	0.64	0.88	10.59	8.73	100.87	0.455019	0.108162
Coltan139b-18	0.9	62.57	13.22	3.4	0.69	0.91	10.58	9	101.27	0.462817	0.112761
Coltan139b-19	0.65	62.62	12.88	3.56	0.61	0.9	10.79	9.11	101.12	0.460951	0.110102
Coltan139b-20	0.68	62.86	12.14	3.57	0.65	0.89	9.84	9.04	99.67	0.481992	0.104079
coltan17-1	0.533	57.0445	22.1141	1.0744	0.4441	b.d.	10.9748	8.0571	100.242	0.426458	0.189094
coltan17-2	0.4662	57.7255	22.0475	1.0307	0.3986	b.d.	10.8674	8.1479	100.684	0.431613	0.186822
coltan17-3	0.5567	56.0797	22.3454	1.1653	0.4565	b.d.	10.8742	8.0005	99.4783	0.426987	0.193341
coltan17-4	0.5902	56.5936	22.8015	1.0843	0.4902	b.d.	10.7423	8.233	100.535	0.43701	0.195075
coltan17-5	0.5604	56.2474	22.1797	1.122	0.463	b.d.	10.8638	8.2111	99.6474	0.433591	0.19172
coltan17-6	0.6837	56.8542	22.6819	0.9704	0.4764	b.d.	10.9494	8.2611	100.877	0.433154	0.193533
coltan17-7	0.4448	57.0937	22.5118	1.0345	0.3955	b.d.	10.903	8.0618	100.445	0.428207	0.191708
coltan17-8	0.4584	57.1752	21.7285	0.9413	0.3971	b.d.	10.8526	8.0382	99.5913	0.428624	0.186064
coltan17-9	0.5854	57.2791	22.274	0.948	0.4125	b.d.	10.873	8.2689	100.641	0.435106	0.18957
coltan17-10	0.4573	57.1068	22.3784	1.036	0.4255	b.d.	10.8624	8.0251	100.291	0.428004	0.190754
SN3-1	2.0327	65.1892	10.7278	2.0595	0.0896	0.0416	17.3148	2.5358	99.991	0.12917	0.0900727
SN3-2	2.0005	65.7808	10.7248	2.1735	0.13	0.0325	17.2698	2.552	100.664	0.130182	0.0893122
SN3-3	1.8954	66.1245	10.167	1.9082	0.087	0.0235	17.5031	2.6236	100.332	0.131804	0.0846575
SN3-4	2.2855	65.1093	10.0742	2.1941	0.1125	0.0587	17.2499	2.4803	99.5645	0.127117	0.0851471
SN3-5	1.9975	66.0272	10.2318	2.055	0.0793	0.0425	17.3209	2.569	100.323	0.1306	0.0852659
SN3-6	2.1394	64.4578	10.1818	2.2711	0.1402	0.0217	17.4752	2.555	99.2422	0.128981	0.086772
SN3-7	2.056	64.7688	10.6947	2.1798	0.098	0.065	17.2979	2.5423	99.7025	0.129568	0.09035
SN3-8	2.1021	65.5184	10.2425	2.1405	0.1236	0.0632	17.3817	2.3889	99.9609	0.12219	0.0859533
SN3-9	2.194	65.4749	10.342	2.1311	0.1482	0.0253	17.3201	2.5544	100.19	0.129959	0.0867685
SN3-10	2.0248	66.0855	10.3716	2.1413	0.0747	0.103	17.37	2.5069	100.678	0.127531	0.0862607
ZKW-1	0.2088	53.0663	28.014	0.1229	0.0484	b.d.	5.6068	13.0887	100.156	0.702766	0.241014
ZKW-2	0.1744	50.3482	30.3936	0.1342	0.1265	b.d.	7.7996	10.7631	99.7396	0.582923	0.266389
ZKW-3	0.4112	59.552	20.5239	0.2946	0.178	b.d.	7.6788	11.8204	100.459	0.609235	0.171711
ZKW-4	0.4032	59.8187	19.7482	0.2967	0.1677	b.d.	6.9558	12.1172	99.5075	0.638251	0.165681
ZKW-5	0.1387	52.6821	27.5467	0.2372	0.1461	b.d.	6.4499	12.3444	99.5451	0.65968	0.23927
ZKW-6	0.5309	60.1363	18.9617	0.3561	0.1849	b.d.	6.5089	13.1137	99.7925	0.671112	0.159429
ZKW-7	0.1132	51.8349	29.0728	0.0598	0.0933	b.d.	0.4427	17.8452	99.4619	0.976092	0.252268
ZKW-8	0.1959	51.768	28.8534	0.0409	0.1032	b.d.	4.5403	14.2356	99.7373	0.760511	0.251084
ZKW-9	0.1469	25.1639	58.6866	0.0886	0.077	b.d.	5.2874	10.7431	100.194	0.672975	0.583828
ZKW-10	0.0847	43.6665	37.6747	0.2202	0.0547	b.d.	7.4819	10.6496	99.8323	0.590436	0.341665
DDB-1	0.1424	28.9776	53.1312	0.4913	0.3609	b.d.	5.1366	11.253	99.493	0.689327	0.524468
DDB-2	0.4842	68.0772	9.8373	0.3192	0.0953	b.d.	8.5764	11.9211	99.3107	0.584683	0.0799701
DDB-3	0.1981	63.7383	15.5979	0.4432	0.2135	b.d.	8.966	10.3073	99.4643	0.537963	0.128315
DDB-4	0.7601	65.8359	11.6873	0.5369	0.4309	b.d.	8.7963	11.2881	99.3355	0.565165	0.0964806
DDB-5	0.1032	55.6479	24.9858	0.3009	0.1659	b.d.	8.0834	11.1917	100.479	0.583727	0.212649
DDB-6	0.7395	68.388	9.7267	0.4365	0.0667	0.0199	8.9004	11.1463	99.424	0.559158	0.0788108
DDB-7	0.1895	60.8094	18.2919	0.1513	0.0942	b.d.	8.1435	11.2635	98.9433	0.583481	0.153218
DDB-8	0.4128	38.4111	42.966	0.2137	0.1776	b.d.	4.5685	12.7455	99.4952	0.738604	0.402218
DDB-9	0.2679	53.8385	25.5306	0.1578	0.1843	b.d.	7.9735	10.4773	98.4299	0.570973	0.221939
DDB-10	0.3111	50.6567	28.9081	0.3873	0.1151	b.d.	6.6002	12.0067	98.9852	0.648191	0.255547
DDB-11	0.0873	51.753	29.6421	0.1686	0.1447	b.d.	7.5278	11.382	100.706	0.604957	0.256245
DDB-12	1.1024	68.0895	9.2013	0.7039	0.0392	b.d.	8.896	11.1363	99.1686	0.559058	0.075176
DDB-13	1.3414	68.089	8.8547	0.74	0.5358	b.d.	8.1583	12.1259	99.8451	0.600858	0.0725502
DDB-14	0.3336	68.2624	10.0336	0.3822	0.1314	b.d.	8.5902	11.5533	99.2867	0.576661	0.0812329
DDB-15	0.2487	67.0696	12.6765	0.2864	0.1232	b.d.	8.9777	11.1315	100.514	0.556697	0.102085
HNDN-1	0.5917	61.0767	18.2519	0.8301	0.0849	b.d.	11.398	8.0357	100.269	0.416584	0.152367
HNDN-2	0.6561	60.4947	18.5023	0.8641	0.1382	b.d.	11.226	8.2749	100.156	0.427448	0.155388
HNDN-3	0.5517	61.3975	17.8975	0.8271	0.0995	b.d.	11.1695	8.2939	100.237	0.429245	0.149186
HNDN-4	0.6165	60.3903	18.661	0.8818	0.1147	b.d.	11.4094	8.1448	100.219	0.419622	0.15674
HNDN-5	0.4014	60.8297	18.9238	0.719	0.1148	b.d.	11.2365	8.4496	100.675	0.432339	0.157632
HNDN-6	0.4927	60.6351	18.5435	0.8329	0.0469	b.d.	11.0831	8.3614	99.9956	0.433137	0.155376
HNDN-7	0.6333	61.4255	18.3213	0.8234	0.0981	b.d.	11.3006	8.4115	101.014	0.429835	0.152122
HNDN-8	0.473	61.2062	18.7474	0.9216	0.0501	b.d.	11.2501	8.3179	100.966	0.428191	0.15558
HNDN-9	0.6432	60.8512	18.7014	0.8299	0.0527	b.d.	11.3963	8.1669	100.642	0.420562	0.156022
HNDN-10	0.5338	60.4756	18.7193	0.8753	0.0847	b.d.	11.5026	8.2377	100.429	0.420403	0.156966
RL2-1	0.1532	35.2277	47.4075	0.6088	0.03	b.d.	10.9334	6.4525	100.813	0.374111	0.44736
RL2-2	0.0651	36.6472	44.8529	0.5903	0.0283	b.d.	11.0197	6.5806	99.7841	0.376877	0.424032
RL2-3	0.1553	35.3145	46.841	0.5487	0.0445	b.d.	11.0049	6.5649	100.474	0.376632	0.443782
RL2-4	0.2853	41.0766	40.3934	0.7918	0.0287	b.d.	8.4866	9.3741	100.436	0.528019	0.371669
RL2-5	0.2035	33.3621	49.0544	0.5802	0.051	b.d.	10.4477	6.4755	100.174	0.385653	0.469343
RL2-6	0.4106	32.9064	49.0164	0.4327	0.0368	b.d.	10.1863	6.8973	99.8865	0.406807	0.472576
RL2-7	0.1902	32.5695	49.6974	0.5698	0.0654	b.d.	9.793	7.2275	100.113	0.427749	0.478584
RL2-8	0.2031	32.784	49.4981	0.4174	0.0272	b.d.	10.0426	7.1076	100.08	0.417526	0.475944
RL2-9	0.2141	33.2708	48.9437	0.4453	0.0191	b.d.	9.811	7.1373	99.8413	0.424229	0.469462
RL2-10	0.3428	35.4542	45.1647	1.2233	b.d.	b.d.	9.6109	7.7003	99.4962	0.447963	0.433836
RL2-11	0.1067	36.1518	46.018	0.7953	0.0484	b.d.	11.1753	6.2983	100.594	0.363387	0.433647
RL2-12	0.2138	33.6087	47.7806	0.5715	0.014	b.d.	11.0429	6.2354	99.4669	0.363822	0.460965
RL2-13	0.2879	34.0711	47.8536	0.557	0.0543	b.d.	10.9199	6.5051	100.249	0.376304	0.457951
RL2-14	0.2063	35.2645	46.4021	0.5183	0.0104	b.d.	11.2499	5.9923	99.6438	0.35043	0.441809
RL2-15	0.2318	34.4494	48.7791	0.3802	b.d.	b.d.	10.3477	7.0367	101.225	0.407842	0.459965
Note:
a. Major element composition of samples CT1, CT3, Buranga, Rongi originating from Legros et al., (2019).
b. Major element composition of sample Coltan139 originating from Che et al., (2015).
c. "n.d.": not determined.
d. "b.d.": below detection limit.
