# Supplementary material for: Characterization of reference materials for in situ U–Pb dating of columbite group minerals by LA-ICP-MS
Source: Royal Society of Chemistry journal article supplement (doi:10.1039/d3ja00162h), 2023-01-01
Supplement: d3ja00162h2.xlsx [file d3ja00162h2.xlsx]

## Sheet: Sheet1
Table S2 Individual trace element compositions of investigated samples in this study
Sample	Sc	Zn	Y	Zr	La	Ce	Pr	Nd	Sm	Eu	Gd	Tb	Dy	Ho	Er	Tm	Yb	Lu	Hf	Pb	Th	U	REE+Sc+Y	Th/U
CT1-01	0.71	276.28	0.219	689.57	0.108	0.151	0.0482	0.31	0.258	0.152	1.13	0.13	0.37	0.09	0.275	0.061	0.282	0.116	341.08	152.313	0.047	290.72	4.4102	0.000161668
CT1-02	0.78	275.01	0.134	688.65	0.124	0.154	0.113	0.23	0.249	0.102	1.06	0.147	0.164	0.055	0.206	0.053	0.299	0.147	337.09	143.849	0.044	287.93	4.017	0.000152815
CT1-03	0.8	313.4	0.207	704.97	0.114	0.159	0.056	0.4	0.38	0.071	1.13	0.125	0.274	0.054	0.128	0.0085	0.171	0.134	348.21	143.705	0.022	290.15	4.2115	7.58229e-05
CT1-04	0.78	246.26	0.124	713.79	0.068	0.107	0.072	0.34	0.231	0.074	1.01	0.171	0.232	0.056	0.245	0.067	0.177	0.073	350.4	139.586	0.032	302.67	3.827	0.000105726
CT1-05	0.88	304.21	0.158	644.66	0.1	0.14	0.113	0.43	0.41	0.08999	1.12	0.152	0.38	0.041	0.284	0.04	0.32	0.137	314.12	151.501	0.041	274.44	4.79499	0.000149395
CT1-06	0.69	298.75	0.154	708.46	0.114	0.112	0.072	0.262	0.49	0.058	1.04	0.123	0.182	0.054	0.191	0.067	0.24	0.073	345.11	142.514	0.044	281.61	3.922	0.000156244
CT1-07	0.68	332.96	0.208	682.79	0.081	0.145	0.105	0.194	0.66	0.071	1.07	0.173	0.32	0.044	0.288	0.052	0.241	0.08	322.73	150.52	0.0218	278.32	4.412	7.83271e-05
CT1-08	0.95	265.13	0.204	649.02	0.082	0.133	0.07	0.4	0.55	0.145	1.16	0.094	0.227	0.068	0.119	0.075	0.173	0.107	307.75	129.536	0.044	263.76	4.557	0.000166818
CT1-09	0.76	253.97	0.157	722.39	0.102	0.082	0.11	0.223	0.264	0.031	1.02	0.152	0.267	0.053	0.198	0.051	0.234	0.129	349.94	137.355	0.021	269.91	3.833	7.78037e-05
CT1-10	0.85	232	0.16	731.71	0.101	0.131	0.043	0.55	0.29	0.133	1.09	0.182	0.169	0.083	0.218	0.056	0.133	0.142	346.59	140.424	0.0231	271.42	4.331	8.5108e-05
CT1-11	0.74	272.67	0.185	665.91	0.063	0.114	0.09	0.33	0.39	0.043	1.15	0.162	0.225	0.055	0.118	0.053	0.297	0.107	310.46	129.947	0.038	248.51	4.122	0.000152911
CT1-12	0.76	377.68	0.181	711.12	0.099	0.174	0.092	0.3	0.44	0.134	1.27	0.137	0.146	0.036	0.22	0.0214	0.36	0.106	334.9	136.021	0.0201	262.84	4.4764	7.64724e-05
CT1-13	0.71	259.15	0.163	716.47	0.111	0.101	0.071	0.204	0.241	0.063	1.16	0.13	0.31	0.022	0.181	0.029	0.302	0.094	334.06	132.671	0.033	262.97	3.892	0.00012549
CT1-14	0.76	244.83	0.157	658.62	0.112	0.101	0.095	0.137	0.234	0.098	1.19	0.116	0.37	0.075	0.197	0.024	0.165	0.122	305.3	145.505	0.029	254.63	3.953	0.000113891
CT1-15	0.81	251.77	0.131	618.91	0.135	0.117	0.093	0.38	0.36	0.096	0.83	0.165	0.212	0.052	0.193	0.07	0.161	0.113	281.78	129.322	0.0285	242.01	3.918	0.000117764
CT1-16	0.83	272.72	0.138	638.32	0.378	0.124	0.114	0.232	0.61	0.072	1.06	0.152	0.158	0.086	0.204	0.083	0.17	0.069	291.19	148.731	0.0301	248.84	4.48	0.000120961
CT1-17	0.74	251.63	0.165	689.04	0.082	0.119	0.043	0.31	0.139	0.077	1.03	0.113	0.34	0.059	0.156	0.064	0.184	0.091	312.84	133.799	0.032	252.94	3.712	0.000126512
CT1-18	0.98	301.86	0.227	721.34	0.108	0.149	0.091	0.234	0.55	0.161	1.22	0.121	0.226	0.078	0.206	0.037	0.38	0.106	334.63	131.598	0.043	258.93	4.874	0.000166068
CT1-19	0.99	380.11	0.215	715.59	0.09	0.144	0.062	0.25	0.51	0.078	1.28	0.16	0.34	0.042	0.221	0.057	0.059	0.086	331.32	126.35	0.056	247.57	4.584	0.000226199
CT1-20	0.79	262.89	0.151	767.76	0.107	0.086	0.097	0.3	0.234	0.0467	0.87	0.167	0.35	0.071	0.24	0.036	0.268	0.102	349.25	135.449	0.033	264.45	3.9157	0.000124787
CT1-21	0.75	257.96	0.249	729.36	0.122	0.1256	0.095	0.39	0.261	0.069	0.8	0.127	0.37	0.083	0.06	0.051	0.163	0.085	335.9	145.389	0.035	268.59	3.8006	0.00013031
CT3-01	0.87	369.46	0.116	473.72	0.157	0.176	0.103	0.34	0.7	0.06	1.05	0.149	0.47	0.091	0.277	0.078	0.31	0.101	396.82	222.384	0.04	373.77	5.048	0.000107018
CT3-02	0.98	328.08	0.244	415.51	0.174	0.115	0.063	0.255	0.73	0.112	1.35	0.133	0.35	0.043	0.226	0.058	0.113	0.076	350.8	206.457	0.048	354.28	5.022	0.000135486
CT3-03	0.88	340.84	0.207	477.22	0.093	0.157	0.078	0.32	0.27	0.07	1.25	0.153	0.22	0.054	0.231	0.051	0.236	0.116	414.32	208.72	0.03	379.96	4.386	7.89557e-05
CT3-04	1.03	303.43	0.19	410.59	0.086	0.189	0.084	0.243	0.49	0.044	1.48	0.15	0.167	0.071	0.248	0.055	0.254	0.117	358.25	165.24	0.046	311.3	4.898	0.000147767
CT3-05	1.1	321.06	0.208	619.16	0.115	0.182	0.097	0.35	0.42	0.078	1.47	0.175	0.172	0.095	0.128	0.07	0.075	0.105	513.72	214.919	0.034	386.83	4.84	8.78939e-05
CT3-06	1.04	344.22	0.186	668.21	0.126	0.147	0.067	0.55	0.56	0.085	1.27	0.143	0.33	0.046	0.141	0.044	0.41	0.149	543.24	221.073	0.0209	405.47	5.294	5.15451e-05
CT3-07	1.3	348.86	0.23	824.68	0.148	0.197	0.088	0.59	0.318	0.042	1.22	0.182	0.35	0.111	0.261	0.082	0.31	0.142	531.45	221.831	0.028	400.96	5.571	6.98324e-05
CT3-08	2.34	333.55	0.592	472.47	0.125	0.123	0.098	0.33	0.38	0.077	1.15	0.186	0.32	0.078	0.118	0.064	0.241	0.147	553.65	227.862	0.049	412.74	6.369	0.000118719
CT3-09	0.9	327.69	0.203	448.78	0.119	0.117	0.064	0.45	0.53	0.053	1.19	0.187	0.4	0.044	0.33	0.0185	0.127	0.133	598.18	221.584	0.0246	408.57	4.8655	6.021e-05
CT3-10	1.14	304.13	0.19	429.82	0.191	0.16	0.084	0.28	0.47	0.048	1.48	0.167	0.39	0.047	0.249	0.045	0.208	0.152	532.02	200.283	0.046	355.67	5.301	0.000129333
CT3-11	0.97	329.34	0.199	453.7	0.157	0.155	0.125	0.38	0.55	0.092	1.21	0.142	0.32	0.079	0.197	0.062	0.4	0.08	527.62	204.903	0.052	378.9	5.118	0.000137239
CT3-12	1.08	351.83	0.32	515.55	0.137	0.174	0.142	0.39	0.64	0.189	1.25	0.191	0.33	0.113	0.31	0.062	0.286	0.104	375.71	233.354	0.0259	410.17	5.718	6.31445e-05
CT3-13	1.19	343.5	0.272	460.84	0.177	0.229	0.098	0.57	0.55	0.143	1.3	0.179	0.39	0.124	0.291	0.075	0.243	0.125	347.27	209.78	0.054	391.39	5.956	0.00013797
CT3-14	1.19	305.26	0.238	460.74	0.176	0.184	0.149	0.3	0.72	0.189	1.16	0.188	0.25	0.103	0.31	0.049	0.226	0.156	351.97	196.994	0.058	361.51	5.588	0.000160438
CT3-15	1.56	344.01	0.4	412.51	0.228	0.205	0.079	0.32	0.54	0.072	1.85	0.219	0.44	0.109	0.287	0.074	0.34	0.199	785.16	215.059	0.043	386.47	6.922	0.000111263
CT3-16	1.27	340.15	0.35	414.5	0.16	0.144	0.115	0.51	0.35	0.091	1.48	0.156	0.41	0.1	0.215	0.068	0.31	0.152	792.25	218.334	0.04	391.3	5.881	0.000102223
CT3-17	1.17	354.8	0.269	470.31	0.205	0.15	0.116	0.75	0.56	0.179	1.67	0.183	0.33	0.179	0.49	0.108	0.43	0.14	453.11	213.236	0.0361	399.72	6.929	9.03132e-05
CT3-18	1.3	343.74	0.261	468.2	0.158	0.22	0.095	0.63	0.75	0.195	1.62	0.138	0.217	0.092	0.23	0.072	0.114	0.132	497.15	206.428	0.06	385.44	6.224	0.000155666
CT3-19	1.39	385.06	0.259	512.39	0.128	0.167	0.108	0.44	0.52	0.137	1.6	0.193	0.48	0.075	0.279	0.051	0.4	0.186	475.95	243.208	0.03	429.83	6.413	6.9795e-05
CT3-20	1.73	413.34	0.27	476.9	0.163	0.254	0.183	0.244	1.15	0.103	1.94	0.237	0.39	0.117	0.36	0.112	0.42	0.237	414.38	232.905	0.054	399.69	7.91	0.000135105
CT3-21	1.64	385.11	0.38	462.47	0.175	0.274	0.149	0.43	0.88	0.188	2.2	0.255	0.73	0.126	0.221	0.069	0.32	0.18	403.24	228.713	0.082	389.57	8.217	0.000210488
Buranga-01	18.48	2007.48	0.25	222.98	0.135	0.141	0.111	0.4	0.47	0.125	1.68	0.176	0.28	0.096	0.292	0.049	0.42	0.145	42.45	26.8566	0.188	125.21	23.25	0.00150148
Buranga-02	22.82	1973.03	0.197	329.87	0.111	0.121	0.124	0.54	0.84	0.084	1.07	0.16	0.202	0.067	0.275	0.086	0.28	0.091	64.07	34.9663	0.274	170.12	27.068	0.00161063
Buranga-03	22.19	1894.34	0.233	327.59	0.163	0.169	0.109	0.63	0.81	0.151	1.51	0.173	0.38	0.067	0.203	0.063	0.207	0.082	63.62	32.8788	0.263	159.78	27.14	0.00164601
Buranga-04	64.71	2425.94	3.17	542.81	0.198	0.231	0.155	0.63	0.74	0.113	1.87	0.189	0.78	0.106	0.37	0.1	1.31	0.185	140.01	83.796	1.703	406.5	74.857	0.00418942
Buranga-05	67.5	2513.26	3.45	572.32	0.242	0.176	0.136	0.79	0.65	0.211	2.16	0.193	0.6	0.111	0.45	0.14	1.67	0.33	149.57	86.7311	1.647	415.95	78.809	0.00395961
Buranga-06	69.12	2502.96	3.33	630.36	0.215	0.247	0.157	0.37	1.15	0.115	1.65	0.211	0.62	0.126	0.362	0.118	1.41	0.188	159.89	95.5679	14.06	465.03	79.389	0.0302346
Buranga-07	72.13	2501.31	3.48	734.06	0.156	0.216	0.177	0.59	0.69	0.075	1.56	0.23	0.85	0.115	0.39	0.096	2.23	0.398	185.56	105.029	2.066	507.17	83.383	0.00407358
Buranga-08	21.22	1942.15	0.33	313.58	0.188	0.13	0.121	0.264	0.82	0.164	1.32	0.13	0.57	0.063	0.269	0.056	0.43	0.118	55.15	34.0165	0.259	163.86	26.193	0.00158062
Buranga-09	63.55	2326	3.46	536	0.197	0.179	0.126	0.73	0.43	0.225	1.95	0.168	0.72	0.126	0.45	0.101	1.57	0.21	138.75	81.5372	1.666	391.57	74.192	0.00425467
Buranga-10	38.38	2321.4	6.65	536.04	0.182	0.218	0.109	0.51	0.43	0.082	1.66	0.222	1	0.212	0.54	0.184	2.2	0.33	170.9	62.4208	1.308	299.09	52.909	0.00437327
Buranga-11	20.87	1972.77	0.248	241.66	0.184	0.19	0.127	0.6	0.7	0.093	1.57	0.225	0.29	0.087	0.153	0.096	0.22	0.134	42.7	35.6072	0.282	170.79	25.787	0.00165115
Buranga-12	20.04	1995.47	0.34	265.53	0.17	0.152	0.117	0.48	0.56	0.148	1.5	0.175	0.23	0.127	0.298	0.038	0.35	0.151	50.13	37.8728	0.235	181.42	24.876	0.00129534
Buranga-13	63.83	2581.24	3.31	640.21	0.16	0.185	0.171	0.28	0.71	0.216	1.5	0.214	0.51	0.131	0.4	0.16	1.71	0.287	162.68	106.583	1.992	511.33	73.774	0.00389572
Buranga-14	58.36	2551.68	3.1	479.4	0.193	0.189	0.142	0.67	0.78	0.207	1.67	0.157	0.56	0.082	0.39	0.133	1.57	0.203	117.07	93.4554	1.908	449.15	68.406	0.00424802
Buranga-15	39.37	1947.05	0.73	346.35	0.145	0.201	0.131	0.46	0.7	0.083	1.4	0.185	0.32	0.064	0.36	0.06	1.542	0.135	66.42	41.273	0.271	196.92	45.886	0.00137619
Buranga-16	36.05	1850.19	0.295	303.25	0.166	0.162	0.053	0.29	0.67	0.089	1.27	0.162	0.39	0.038	0.206	0.079	0.36	0.137	59.49	40.1333	0.392	191.8	40.417	0.0020438
Buranga-17	22.07	2060.73	0.243	271.86	0.156	0.165	0.108	0.31	0.37	0.167	1.47	0.176	0.47	0.074	0.32	0.099	0.32	0.118	51.94	33.2204	0.267	158.43	26.636	0.00168529
Buranga-18	20.42	1948.98	0.187	256.62	0.149	0.146	0.118	0.36	0.3	0.034	1.31	0.157	0.46	0.106	0.293	0.041	0.33	0.106	48.16	33.673	0.237	161.24	24.517	0.00146986
Buranga-19	7.11	1402.54	0.434	132.29	0.135	0.108	0.114	0.269	0.348	0.046	1.41	0.159	0.247	0.078	0.274	0.105	0.28	0.129	34.95	15.4894	0.057	78.33	11.246	0.000727691
Buranga-20	20.59	1913.54	0.281	248.82	0.125	0.164	0.094	0.39	0.188	0.146	1.32	0.148	0.32	0.045	0.31	0.075	0.4	0.092	46.86	31.7847	0.258	161.11	24.688	0.00160139
Buranga-21	68.39	2466.09	4.88	732.92	0.152	0.222	0.141	0.33	0.55	0.146	1.87	0.211	0.85	0.194	0.42	0.15	1.88	0.347	185.83	131.489	2.92	627.21	80.733	0.00465554
Rongi-01	2.87	1993.09	0.693	400.84	0.095	0.088	0.054	0.146	0.171	0.064	0.71	0.093	0.172	0.048	0.128	0.048	0.32	0.07	29.29	14.2549	0.123	79.21	5.77	0.00155283
Rongi-02	3.24	1987.72	0.539	407.17	0.047	0.06	0.061	0.23	0.31	0.058	0.63	0.069	0.14	0.031	0.095	0.03	0.25	0.053	30.45	15.005	0.12	81.04	5.843	0.00148075
Rongi-03	2.55	1920.33	0.575	416.4	0.059	0.087	0.032	0.154	0.237	0.077	0.66	0.088	0.168	0.034	0.126	0.039	0.34	0.064	31.69	14.9944	0.135	85.24	5.29	0.00158376
Rongi-04	3.07	2041.14	0.588	416.06	0.059	0.047	0.057	0.202	0.193	0.096	0.63	0.077	0.21	0.055	0.133	0.037	0.29	0.059	31.81	15.8319	0.096	85.24	5.803	0.00112623
Rongi-05	2.63	915.43	0.158	223.57	0.04	0.044	0.029	0.217	0.227	0.06	0.51	0.066	0.081	0.0229	0.07	0.0265	0.146	0.043	17.07	5.34307	0.0252	37.24	4.3704	0.000676692
Rongi-06	3.28	1997.45	0.843	445.76	0.056	0.086	0.066	0.271	0.224	0.084	0.73	0.099	0.184	0.045	0.168	0.034	0.28	0.079	32.07	16.5034	0.148	92.43	6.529	0.00160121
Rongi-07	3.05	1992.8	0.729	450.48	0.066	0.095	0.039	0.131	0.129	0.041	0.69	0.061	0.199	0.031	0.094	0.055	0.327	0.067	31.9	17.4737	0.16	98	5.804	0.00163265
Rongi-08	6.24	1917.61	1.213	448.2	0.058	0.072	0.049	0.219	0.166	0.039	0.68	0.078	0.243	0.042	0.129	0.047	0.325	0.052	33.7	16.5111	0.134	92.04	9.652	0.00145589
Rongi-09	2.45	1911.88	0.671	421.5	0.095	0.078	0.054	0.252	0.123	0.11	0.73	0.102	0.172	0.042	0.165	0.033	0.384	0.065	31.69	15.5949	0.101	85.2	5.526	0.00118545
Rongi-10	2.69	1916.94	0.665	429.26	0.081	0.09	0.045	0.212	0.175	0.065	0.73	0.078	0.228	0.035	0.094	0.031	0.337	0.076	31.87	14.7304	0.108	83.68	5.632	0.00129063
Rongi-11	3.11	1976.02	0.687	458.38	0.071	0.1	0.053	0.164	0.235	0.051	0.68	0.064	0.176	0.043	0.176	0.041	0.336	0.065	32.56	17.8259	0.136	98.89	6.052	0.00137527
Rongi-12	3.23	1908.38	0.804	441.84	0.077	0.095	0.032	0.236	0.34	0.103	0.94	0.119	0.196	0.062	0.12	0.0376	0.298	0.089	31.3	16.2519	0.132	90.55	6.7786	0.00145776
Rongi-13	2.35	1908.48	0.704	459.16	0.082	0.073	0.069	0.09	0.43	0.101	0.75	0.111	0.157	0.055	0.117	0.037	0.291	0.075	33.03	18.1549	0.161	102.12	5.492	0.00157658
Rongi-14	3.01	1905.59	0.587	464.84	0.094	0.085	0.073	0.173	0.4	0.053	0.66	0.07	0.263	0.05	0.124	0.0361	0.275	0.092	32.67	18.3389	0.16	101.58	6.0451	0.00157511
Rongi-15	4.73	2046.94	1.22	427.98	0.073	0.059	0.084	0.146	0.38	0.0231	0.62	0.086	0.383	0.035	0.128	0.046	0.408	0.073	31.53	15.476	0.125	84.43	8.4941	0.00148052
Rongi-16	2.61	2064.54	0.599	462.86	0.063	0.097	0.053	0.111	0.178	0.047	0.74	0.109	0.231	0.0288	0.109	0.0421	0.382	0.057	33.11	18.7761	0.138	101.21	5.4569	0.0013635
Rongi-17	2.82	2153.7	0.823	438.22	0.051	0.065	0.043	0.32	0.239	0.089	0.68	0.075	0.169	0.034	0.146	0.051	0.31	0.049	30.89	16.3588	0.118	88.9	5.964	0.00132733
Rongi-18	2.79	1989.77	0.842	454.97	0.066	0.081	0.061	0.143	0.149	0.077	0.74	0.097	0.32	0.054	0.124	0.0256	0.372	0.06	34.8	16.9103	0.167	92.49	6.0016	0.0018056
Rongi-19	2.53	2022.97	0.751	480.12	0.084	0.069	0.053	0.132	0.36	0.048	0.71	0.091	0.209	0.052	0.129	0.042	0.326	0.078	34.13	19.3936	0.188	105.56	5.664	0.00178098
Rongi-20	3.6	616.02	0.143	139.05	0.045	0.083	0.072	0.31	0.32	0.0279	0.65	0.1	0.184	0.053	0.08	0.043	0.163	0.059	10.25	4.87409	0.0298	28.77	5.9329	0.0010358
Rongi-21	3.2	639.8	0.088	86.92	0.052	0.064	0.07	0.226	0.264	0.061	0.52	0.059	0.153	0.0268	0.141	0.031	0.117	0.06	6.72	2.97626	0.0228	23.53	5.1328	0.000968976
Coltan139-01	6771.39	356.38	2029.56	2424.99	0.26	4.04	1.87	24.05	98.93	0.268	248.93	70.98	383.26	38.84	70.43	10.09	74.46	8.44	350.82	168.383	60.61	1657.51	9835.8	0.0365669
Coltan139-02	6762.93	360.71	2489.34	2379.42	0.356	5.03	2.45	32.61	163.38	0.309	396.14	98.81	495.3	47.79	86.22	12.34	92.82	11.41	341.44	187.634	99.58	1752.51	10697.2	0.0568214
Coltan139-03	6633.35	365.57	2010.5	2359.68	0.234	4.09	1.84	23.55	98.59	0.242	253.83	70.63	381.74	38.41	70.39	10.06	72.18	8.41	346.11	168.562	64.65	1583.71	9678.05	0.0408219
Coltan139-04	6738.97	359.09	2015.81	2414.03	0.183	4.11	1.91	23.41	99.01	0.167	250.64	70.57	384.24	39.38	71.49	10.12	73.42	8.65	352.24	165.987	61.72	1673.22	9792.08	0.036887
Coltan139-05	6751.08	362.31	2075.87	2416.53	0.206	4.02	1.9	24.32	108.27	0.149	268.11	74.06	396.66	39.36	72.93	10.25	75.31	8.87	350.78	168.99	65.28	1637.61	9911.36	0.039863
Coltan139-06	6806.09	368.7	1997.39	2442.12	0.222	3.73	1.98	23.01	98.9	0.172	250.78	70.06	379.15	38.88	70.43	10.27	74.69	8.53	351.98	167.045	60.31	1644.93	9834.28	0.0366642
Coltan139-07	6593.92	366.72	1964.36	2343.44	0.213	3.88	1.88	22.84	96.48	0.143	241.66	67.93	372.25	37.11	69.74	9.94	71.66	8.28	339.69	166.064	59.43	1603.77	9562.29	0.0370564
Coltan139-08	6806.37	381.96	2033.51	2412.43	0.215	4	1.99	23.4	100.82	0.157	255.43	71.48	387.64	39.05	71.88	10.21	74.35	8.79	357.25	171.676	62.2	1638.73	9889.29	0.0379562
Coltan139-09	6886.93	364.01	2062.67	2474.93	0.181	4.25	1.97	23.17	100.81	0.17	259.02	71.56	388.3	39.65	71.28	10.05	73.39	8.57	359.53	174.023	62.22	1676.89	10002	0.0371044
Coltan139-10	6731.83	360.99	2023.56	2413.59	0.207	4	1.96	23.46	99.52	0.209	249.99	70.33	384.25	38.7	71.3	10.39	74.88	8.53	354.14	168.492	61.48	1653.53	9793.12	0.0371811
Coltan139-11	6781.83	349.65	2047.69	2426.93	0.215	3.98	1.98	24.6	101.58	0.186	255.84	72.04	389.86	38.82	72	10.37	74.95	8.62	359.91	164.752	63.32	1705.54	9884.56	0.0371261
Coltan139-12	6913.71	349.11	2043.11	2484.7	0.22	4.08	2.02	24.02	101.45	0.214	257.04	72.02	393.35	39.19	73.63	10.31	76.04	8.73	364.05	166.024	62.47	1703.6	10019.1	0.0366694
Coltan139-13	6844.25	347.03	2042.63	2476.8	0.182	3.86	2.06	23.56	99.28	0.145	251.65	72.06	393.83	39.02	73.19	10.37	74.65	8.61	364.87	158.801	62.07	1656.13	9939.35	0.0374789
Coltan139-14	6687.08	338.52	2006.12	2419.76	0.186	4.07	1.95	23.28	100.23	0.133	250.94	69.54	384.78	37.45	71.68	10.35	73.46	8.51	356.84	156.152	60.68	1646.95	9729.76	0.0368439
Coltan139-15	6823.52	336.4	2002.06	2412.38	0.155	3.95	2.01	23.36	100.58	0.164	255.84	70.69	385.57	38.54	70.9	10.13	72.82	8.65	351.81	153.666	61.14	1611.47	9868.94	0.0379405
Coltan139-16	6612.98	333.87	1965.89	2374.1	0.227	4.12	1.9	22.63	97.23	0.171	241.27	69.52	378.17	36.95	69.59	10.2	71.22	8.36	341.13	154.614	58.68	1607.86	9590.43	0.0364957
Coltan139-17	6713.79	328.63	2008.65	2420.11	0.195	3.87	1.914	23.68	101.2	0.096	253.82	71.91	387.04	38.5	71.45	10.29	74.39	8.66	359.54	152.816	61.03	1645.15	9769.45	0.0370969
Coltan139-18	6881.86	350.65	2143.07	2692.07	0.288	4.48	2.252	28.43	128.55	0.125	304.13	79.06	422.06	41.84	74.58	10.63	79.08	9.19	355.79	175.608	67.86	1687.55	10209.6	0.0402121
Coltan139-19	7053.84	345.28	2803.78	2505.68	0.481	6.06	3.24	43.59	205.01	0.374	482.61	112.76	554.26	52.65	95.09	13.89	104.57	12.9	360.29	228.665	120.73	1897.7	11545.1	0.0636191
Coltan139-20	7099.59	336.46	2388.65	2499.55	0.216	4.85	4.33	33.62	159.57	0.226	371.35	90.69	476.05	46.2	81.22	11.83	83.11	10.13	369.23	177.461	82.86	1800.45	10861.6	0.0460218
Coltan139-21	6635.37	360.93	2012.04	2365.85	0.341	4.67	2.16	26.28	113.07	0.122	273.17	74.07	392.93	39.78	70.44	10.13	77.03	9.11	344.26	190.435	68.81	1641.06	9740.71	0.0419302
Coltan139-22	7105.36	338.06	2888.69	2507.83	0.93	7.17	3.89	52.92	254.35	0.454	552.26	121.51	584.58	55.2	100.99	14.7	106.2	13.26	361.78	250.951	116.9	1955.43	11862.5	0.0597822
Coltan139-23	6560.09	321.99	1921.72	2270.09	0.301	4.6	1.87	22.08	104.69	0.199	262.96	71.88	379.35	37.2	69.02	10.69	79.96	9.77	330.06	233.417	68.08	1468.71	9536.38	0.0463536
Coltan139-24	6446.46	336.78	2232.29	2296.52	0.423	5.12	2.52	33.12	148.6	0.332	347.69	86.28	446.1	43.31	79.02	11.03	83.95	9.92	327.5	199.491	86.49	1684.64	9976.17	0.0513403
Coltan139-25	6642.33	320.79	2027.11	2358.89	0.207	4.16	2.16	25.78	109.9	0.141	269.13	72.43	390.72	38.34	69.77	10.24	72.42	8.5	338.61	159.636	64.11	1613.02	9743.34	0.0397453
Coltan139-26	6665.46	333.05	2003.86	2403.99	0.168	4.03	2.03	23.58	99.62	0.1	250.99	70.66	383.52	38.24	70.55	10.14	74.4	8.47	347.72	158.259	61	1621.61	9705.82	0.0376169
Coltan139-27	6544.55	299.2	1901.71	2301.55	0.5	4.77	2.06	27.24	124.66	0.248	295.49	73.69	368.08	36.73	69.15	10.12	82.13	10.2	330.15	165.491	74.88	1240.02	9551.33	0.0603861
Coltan139-28	6763.13	315.23	2075.98	2424.57	0.238	4.23	1.98	24.71	105.52	0.127	263.64	74.69	405.35	40.18	74.66	10.76	77.49	9.26	353.11	155.407	65.22	1715.95	9931.94	0.0380081
Coltan139-29	6868.72	337.31	2045.2	2465.91	0.229	4.32	1.96	24.29	104.1	0.155	259.91	71.99	397.58	38.98	72.63	10.37	74.6	8.82	357.01	158.985	63.09	1665.54	9983.85	0.0378796
Coltan139-30	7155.38	359.7	2127.86	2553.86	0.21	4.2	2.019	25.02	107.26	0.121	272.39	76.04	414.48	40.82	76.31	10.57	79.43	9.09	371.72	165.855	66.54	1714.23	10401.2	0.0388163
Coltan139-31	7008.99	375.38	2097.15	2488.36	0.194	4.24	2.128	26.02	113.79	0.175	281.18	76.35	410.78	40.64	74.29	10.48	78.37	9.26	368.47	167.301	69.73	1699.77	10234	0.0410232
Coltan139-32	7085.73	359.05	2121.35	2512.83	0.216	4.15	2.04	25.39	112.99	0.154	280.71	75.98	413.06	40.66	76.38	10.78	77.83	9.24	372.33	160.99	66.67	1713.33	10336.7	0.0389125
Coltan139-33	7429.7	363.03	2150.29	2630.64	0.275	4.06	2.116	25.32	109.52	0.119	270.52	75.91	414.51	41.63	77.27	11.13	82.85	9.38	383.8	165.053	66.66	1740.65	10704.6	0.038296
Coltan139-34	7433.82	370.52	2142.44	2619.5	0.161	4.22	2.086	24.89	106.1	0.137	268.53	74.66	413.66	40.94	75.66	11.19	81.3	9.35	390.81	161.866	64.43	1720.16	10689.1	0.0374558
Coltan139-35	7384.99	393.57	2146.74	2569.31	0.631	4.28	2.185	25.75	106.82	0.104	268.02	76.49	418.06	41.43	75.66	11.05	79.66	9.1	381.59	173.57	64.87	1722.51	10651	0.0376602
Coltan139-36	7301.37	390.96	2166.35	2589.46	0.284	4.29	2.176	25.01	107.13	0.125	269.49	77.77	423.2	41.65	76.47	11.02	79.41	9.13	383.71	175.959	66.04	1743.37	10594.9	0.0378807
Coltan139-37	7315.35	378.34	2183.26	2620.9	0.264	4.31	2.204	25.5	113.04	0.113	276.11	77.94	423.23	42.23	75.86	11.17	79.89	9.25	381.63	168.87	66.9	1748.37	10639.7	0.0382642
Coltan139-38	7149.78	374.14	2093.72	2516.3	0.172	4.15	2.121	25.23	106.38	0.082	263.21	72.79	409.42	40.07	74.27	10.53	79.24	8.8	363.94	178.505	63.35	1699.17	10340	0.0372829
Coltan139-39	7204.14	367.25	2182.99	2601.91	0.219	4.48	2.15	26.18	109.73	0.129	275.69	77.06	419.62	41.88	78.53	11.33	80.24	9.51	378.32	168.169	66.02	1784.51	10523.9	0.0369962
Coltan139-40	7312.32	363.36	2164.28	2581.85	0.246	4.21	2.091	25.25	110.55	0.132	271.43	76.04	419.78	42.7	77.06	11.15	79.68	9.44	381.34	169.042	67.11	1754.88	10606.4	0.0382419
Coltan139-41	7349.24	365.81	2167.42	2597.87	0.221	4.38	2.12	26.89	112.89	0.146	272.04	76.93	424	41.55	77.43	11.17	79.17	9.05	378.66	170.914	66.59	1754.62	10654.6	0.0379512
Coltan139-42	7158.1	353.27	2089.44	2485.13	0.276	4.22	2.077	24.32	105.23	0.135	263.19	74.55	406.44	40.61	74.67	10.81	77.39	8.91	374.52	163.535	64.18	1720.42	10340.4	0.0373048
Coltan139-43	7000.25	371.16	2073.09	2489.07	0.29	4.33	2.11	26.54	106.63	0.174	268.22	73.47	399.31	39.74	73.89	10.43	75.65	8.79	366.99	165.825	64.08	1724.84	10162.9	0.0371513
Coltan139-44	6937.12	358.76	2059.46	2445.96	0.244	4.62	2.158	26.39	105.94	0.184	259.56	73	396.32	39.29	73.8	10.56	75.2	8.94	362.44	161.315	62.71	1687.78	10072.8	0.0371553
Coltan139-45	7093.23	340.72	2100.34	2534.14	0.194	4.22	1.969	25.24	104.69	0.133	264.73	74.25	411.46	40.94	75.39	10.73	76.03	8.78	371.15	154.664	64.49	1716.12	10292.3	0.037579
Coltan139-46	6736.34	358.12	1985.74	2382.29	0.179	4.2	2.011	25.08	104.55	0.139	251.47	70.87	383.07	38.42	70.03	10.26	73.32	8.66	348.75	169.707	59.09	1623.83	9764.34	0.0363893
Coltan139-47	6975.72	372.57	2104.68	2487.36	0.194	4.18	2.063	25.2	106.42	0.111	264.98	73.99	402.71	40.43	74.03	10.45	77.36	8.86	362.48	165.948	62.89	1685.46	10171.4	0.0373133
Coltan139-48	7172.61	358.23	2132.48	2559.87	0.205	4.34	1.998	26.6	106.49	0.112	266.88	75.49	411.5	41.42	75.81	10.95	78.38	9.23	375.68	161.243	64.67	1727.24	10414.5	0.0374412
Coltan139-49	7280.13	360.67	2207.59	2567.74	0.17	4.18	2.032	26.8	109.43	0.183	286.5	79.27	430.21	42.83	78.87	11.06	81.81	9.54	378.93	167.549	74.29	1752.62	10650.6	0.042388
Coltan139-50	7157.34	358.62	2286.01	2508.1	0.235	4.46	2.361	30.26	144.31	0.172	343.96	86.46	448.09	43.24	79.67	11.26	81.61	9.79	361.18	167.496	67.47	1741.85	10729.2	0.0387347
Coltan139-51	7383.81	368.19	2207.52	2572.98	0.246	4.42	2.123	26.43	112.09	0.109	282.34	78.24	423.01	41.95	77.51	11.23	82.28	9.45	378.54	166.198	71.8	1732.09	10742.8	0.0414528
Coltan139-52	7438.48	370.59	2246.07	2606.21	0.203	4.34	2.21	26.46	109.88	0.121	284.95	80.45	434.42	43.55	81.52	11.85	85.19	10.36	377.28	173.201	68.49	1873.83	10860.1	0.0365508
Coltan139-53	7530.36	375.78	2231.93	2631.05	0.231	4.42	2.193	26.87	112.98	0.109	289.07	80.27	436.07	43.46	79.33	11.31	82.51	9.91	390.58	169.578	73.19	1780.49	10941	0.0411067
Coltan139-54	7224.73	353.67	2363.96	2530.13	0.215	4.35	2.309	30.62	157.34	0.223	363.39	91.07	465.89	44.48	81.66	11.47	83.3	10.12	370.34	167.179	75.03	1768.18	10935.1	0.0424335
Coltan139-55	7436.01	384.17	2218.79	2606.47	0.217	4.37	2.137	26.55	109.54	0.135	280.02	77.62	423.2	42.68	77.83	11.15	82.29	9.35	386.35	165.075	67.18	1780.2	10801.9	0.0377373
Coltan139-56	7218.06	364.46	2163.32	2531.22	0.257	4.57	2.166	25.73	106.52	0.192	271.7	76.69	418.01	42.14	76.79	11.17	79.99	9.46	371.17	175.934	65.73	1785.9	10506.8	0.036805
Coltan139-57	7230.16	375.28	2163.43	2589.18	0.181	4.25	2.073	25.4	107.69	0.147	274.1	75.99	421.49	41.9	76.78	11.04	79.88	9.35	377.81	164.934	66.16	1762.5	10523.9	0.0375376
Coltan139-58	6918.77	356.95	2041.37	2481.37	0.19	4.01	1.995	25.17	99.64	0.158	257.22	72.07	388.54	39.24	72.22	10.25	75.65	8.73	360.31	161.925	60.42	1692.35	10015.2	0.0357018
Coltan139-59	7003.61	349.66	2092.78	2538.98	0.196	4.01	1.977	24.38	103.24	0.123	261.76	72.9	400.55	40.7	73.46	10.71	77.37	8.93	367.21	160.454	63.36	1707.36	10176.7	0.0371099
Coltan17-01	7.61	1449.64	46.24	1638.22	0.525	0.28	0.054	0.224	0.37	0.048	1.06	0.526	7.88	1.927	6.96	1.443	13.03	1.637	162.66	73.5961	8.11	741.87	89.814	0.0109318
Coltan17-02	7.52	1379.51	45.79	1594.29	2.039	2.64	0.191	0.9	0.38	0.076	1.29	0.593	7.45	1.857	6.7	1.458	12.74	1.497	153.75	175.056	10.91	836.66	93.121	0.0130399
Coltan17-03	7.45	1420.58	40.95	1411.77	0.706	0.1	0.071	0.293	0.48	0.09	0.88	0.458	6.65	1.553	5.92	1.282	12.17	1.499	138.54	63.0613	1.427	541.24	80.552	0.00263654
Coltan17-04	6.6	1285.9	37.58	1510.33	1.26	1.05	0.045	0.225	0.212	0.026	1.18	0.426	5.52	1.325	5.63	1.206	10.86	1.349	147.5	79.7598	4.41	626.59	74.494	0.0070381
Coltan17-05	5.36	1121.86	29.74	1260.12	0.77	0.823	0.064	0.412	0.219	0.065	0.63	0.406	4.46	1.002	4.31	0.884	8.23	0.918	129.46	128.132	19.22	630.26	58.293	0.0304954
Coltan17-06	7.42	1368.47	35.88	1480.85	0.734	0.991	0.073	0.28	0.32	0.085	0.87	0.468	6.02	1.379	5.48	1.144	11.34	1.283	145.79	166.539	15.48	1035.21	73.767	0.0149535
Coltan17-07	7.26	1344.39	48.64	1641.94	2.81	0.089	0.07	0.32	0.234	0.059	1.32	0.539	8.01	1.814	7.12	1.46	14.29	1.552	159.92	60.7459	4.31	673.08	95.587	0.0064034
Coltan17-08	8.36	1385.35	47.51	1631.91	1.021	0.134	0.088	0.136	0.5	0.084	0.98	0.629	7.4	1.838	6.94	1.485	13.35	1.6	160.24	61.0977	2.98	634.75	92.055	0.00469476
Coltan17-09	7.28	1371.05	45.93	1555.41	0.516	0.093	0.087	0.33	0.31	0.118	1.02	0.564	7.37	1.809	6.86	1.403	13.15	1.513	155.56	57.988	2.034	606.11	88.353	0.00335583
Coltan17-10	8.1	1333.38	48.31	1627.49	0.322	0.084	0.063	0.37	0.43	0.065	1.02	0.551	7.61	1.823	7.13	1.489	12.95	1.566	157.99	57.0966	1.75	623.7	91.883	0.00280584
Coltan17-11	7.41	1346.33	46.09	1570.93	0.531	0.101	0.066	0.43	0.44	0.083	0.95	0.588	7.85	1.772	6.69	1.447	13.54	1.506	154.29	54.8122	1.66	601.14	89.494	0.00276142
Coltan17-12	7.45	1375.3	44.23	1612.81	1.048	1.38	0.097	0.326	0.37	0.063	1.07	0.509	7.25	1.804	6.06	1.34	12.25	1.405	150.88	304.409	10.55	1393.83	86.652	0.00756907
Coltan17-13	7.2	1354.59	42.85	1567.95	3.06	3.06	0.15	0.35	0.319	0.094	0.96	0.517	6.98	1.821	5.97	1.367	12.01	1.358	147.22	265.596	8.89	1851.35	88.066	0.0048019
Coltan17-14	6.57	1192.61	42.42	1524.84	1.737	1.788	0.106	0.234	0.36	0.184	0.95	0.509	7.26	1.651	6	1.316	12.36	1.456	146.37	168.058	4.77	1250.53	84.901	0.00381438
Coltan17-15	7.55	1443.12	43.31	1618.6	3.58	3.2	0.184	0.46	0.27	0.142	1.17	0.528	6.41	1.645	6.2	1.384	12.44	1.435	157.61	178.043	13.27	1743.93	89.908	0.00760925
Coltan17-16	6.38	1416.15	44.06	1724.16	2.57	2.139	0.13	0.33	0.44	0.101	1.03	0.615	7.6	1.756	6.4	1.372	12.86	1.446	166.02	278.645	18.27	1588.44	89.229	0.0115019
Coltan17-17	7.72	1375.85	44.2	1898.13	4.21	4.07	0.249	0.601	0.3	0.078	0.88	0.569	7.4	1.727	6.65	1.364	12.05	1.367	180.63	243.638	44.04	2429.54	93.435	0.0181269
Coltan17-18	6.46	1236.98	42.97	1579.29	1.513	0.639	0.069	0.34	0.231	0.0286	1.24	0.561	6.79	1.721	6.15	1.334	12.38	1.468	155.39	63.5988	11.91	863.53	83.8946	0.0137922
Coltan17-19	7.55	1285.92	45.2	1536.28	0.631	0.123	0.075	0.34	0.51	0.085	0.92	0.618	7.39	1.764	6.71	1.407	13.02	1.521	149.47	60.4175	1.607	596.42	87.864	0.00269441
Coltan17-20	7.09	1328.31	54.63	1652.47	2.36	3.65	0.202	0.69	0.41	0.208	1.21	0.703	8.09	1.867	6.67	1.394	11.89	1.361	157.76	351.835	25.39	1719.65	102.425	0.0147646
Coltan17-21	7.04	1302.13	45.22	1560.41	1.004	0.203	0.095	0.32	0.53	0.099	1.13	0.582	7.01	1.744	6.16	1.368	12.76	1.45	151.26	58.5705	4.97	632.82	86.715	0.00785373
SN3-01	421.65	392	69.89	1946.21	0.06	0.073	0.039	0.3	0.63	0.065	2.97	1.733	15.19	2.178	5.31	0.807	5.66	0.618	154.97	58.9545	1.369	783.59	527.173	0.00174709
SN3-02	385.54	369.47	62.15	1557.33	0.071	0.094	0.065	0.287	0.51	0.087	2.42	1.543	13.46	1.823	4.57	0.681	5.16	0.521	121.87	43.735	0.654	578.08	478.982	0.00113133
SN3-03	393.93	396.1	66.09	1601.16	0.063	0.094	0.047	0.22	0.77	0.068	2.45	1.686	14.68	1.953	4.63	0.78	5.82	0.565	126.33	43.6146	0.673	591.77	493.846	0.00113727
SN3-04	422.7	398.77	87.4	2104.68	0.056	0.082	0.06	0.323	0.77	0.076	3.32	2.21	19.78	2.78	6.73	0.996	7.4	0.729	160.35	59.9263	1.103	838.52	555.412	0.00131541
SN3-05	421.3	358.22	86.36	2074.17	0.078	0.181	0.058	0.239	0.93	0.037	4.05	2.23	18.5	2.58	6.33	1.104	7.53	0.744	154.52	62.2444	0.984	774.29	552.251	0.00127084
SN3-06	410.53	384.51	67.68	1888.72	0.072	0.081	0.095	0.203	0.61	0.063	2.63	1.745	14.48	1.968	5.16	0.806	5.76	0.624	153.35	49.7476	0.817	685.94	512.507	0.00119107
SN3-07	417.59	387.04	68.65	1918.78	0.063	0.116	0.047	0.268	0.58	0.067	3.03	1.743	15.4	2.099	5.45	0.828	5.47	0.673	154.94	52.0823	0.817	734.21	522.074	0.00111276
SN3-08	391.91	395.67	64.86	1667.55	0.095	0.099	0.05	0.183	0.57	0.04	2.52	1.523	14.13	1.914	4.98	0.709	5.37	0.548	132.3	43.6336	0.615	604.85	489.501	0.00101678
SN3-09	378.02	373.54	64.01	1540.76	0.082	0.105	0.04	0.233	0.516	0.072	2.87	1.514	14.56	1.923	4.64	0.748	5.34	0.587	121.99	41.6079	0.648	580.15	475.26	0.00111695
SN3-10	355.89	386.09	58.69	1461.2	0.084	0.089	0.047	0.27	0.41	0.068	2.45	1.314	12.22	1.662	4.41	0.701	5.56	0.491	114.49	38.6103	0.501	533.05	444.356	0.000939874
SN3-11	395.49	377.99	64.45	1634.25	0.084	0.073	0.058	0.238	0.69	0.085	2.93	1.64	13.61	1.986	4.78	0.813	5.33	0.631	129.22	44.7115	0.686	613.22	492.888	0.00111868
SN3-12	390.36	388.41	64.25	1526.51	0.072	0.087	0.061	0.204	0.7	0.045	2.62	1.554	13.64	1.925	4.61	0.745	5.2	0.614	120.67	41.0286	0.624	569.74	486.687	0.00109524
SN3-13	390.08	386.91	64.59	1611.75	0.073	0.071	0.071	0.271	0.74	0.042	3.07	1.636	14.38	1.928	4.83	0.761	5.39	0.608	128.56	43.8963	0.652	597.09	488.541	0.00109196
SN3-14	407.78	395.22	68.8	1907.2	0.071	0.088	0.038	0.31	0.49	0.048	2.82	1.676	14.55	1.985	4.94	0.771	5.37	0.568	153.73	52.1572	0.795	713.82	510.305	0.00111373
SN3-15	424.14	369.69	93.55	2510.43	0.103	0.061	0.07	0.4	0.79	0.047	4.56	2.5	20.8	2.84	7.17	1.047	7.86	0.789	189.8	71.6964	1.309	1004.09	566.727	0.00130367
SN3-16	422.81	372.83	83.12	2241.91	0.061	0.08	0.064	0.219	0.73	0.034	3.75	2	18.49	2.56	6.48	0.982	6.66	0.766	174.75	60.4067	1.038	864.89	548.806	0.00120015
SN3-17	415.07	380.99	86.06	2099.47	0.088	0.126	0.059	0.263	0.71	0.081	4.03	2.27	19.47	2.61	6.64	1.065	6.88	0.748	158.39	56.7466	1.012	810.24	546.17	0.00124901
SN3-18	395.54	357.57	64.86	1625.29	0.076	0.085	0.046	0.4	0.55	0.047	2.67	1.686	14.21	2.037	5.02	0.781	5.17	0.615	128.95	41.4895	0.701	600.41	493.793	0.00116754
SN3-19	397.07	340.25	63.51	1743.55	0.082	0.081	0.057	0.262	0.43	0.088	2.43	1.651	13.73	1.806	4.77	0.779	5.46	0.525	138.02	48.9737	0.756	659.77	492.731	0.00114585
SN3-20	414.35	382.79	72.78	1938.88	0.103	0.12	0.068	0.25	0.74	0.099	2.27	1.793	15.65	2.16	4.93	0.811	5.88	0.665	151.11	55.1182	0.887	781.63	522.669	0.00113481
SN3-21	387.38	378.86	66.56	1523.72	0.092	0.091	0.073	0.227	0.46	0.07	2.97	1.645	14.09	1.973	5.1	0.824	5.91	0.59	118.19	42.4224	0.656	599.9	488.055	0.00109352
SN3-22	436.37	401.18	72.65	2060.73	0.102	0.109	0.067	0.39	0.57	0.109	3.1	1.879	15.03	2.121	5.28	0.851	6.2	0.698	162.4	57.9201	0.886	793.34	545.526	0.0011168
SN3-23	429.11	394.16	71.25	1983.05	0.074	0.077	0.053	0.281	0.56	0.073	2.9	1.699	16.08	2.104	5.09	0.82	5.72	0.637	160.39	56.6072	0.881	771.39	536.528	0.00114209
SN3-24	416.23	372.91	70.41	1932.72	0.047	0.094	0.089	0.37	0.809	0.053	3.02	1.743	15.35	1.999	5.11	0.808	5.7	0.612	149.96	55.6552	0.85	777.84	522.444	0.00109277
SN3-25	419.3	385.89	69.53	1929.51	0.083	0.075	0.065	0.219	0.52	0.106	3.09	1.688	14.84	2.052	5.21	0.871	5.87	0.629	154.19	53.3447	0.818	747.69	524.148	0.00109404
SN3-26	401.48	383.17	67.34	1668.13	0.082	0.075	0.053	0.264	0.55	0.067	2.8	1.627	14.28	1.964	4.91	0.754	5.4	0.658	129.54	46.7458	0.667	658.32	502.304	0.00101319
SN3-27	415.58	379.1	70.33	1975.29	0.115	0.08	0.085	0.201	0.47	0.088	3.58	1.716	15.11	2.142	5.26	0.808	5.56	0.574	158.07	55.6999	0.852	756.95	521.699	0.00112557
SN3-28	411.08	359.08	71.63	1930.03	0.095	0.071	0.044	0.258	0.61	0.079	2.83	1.694	14.4	1.959	4.72	0.821	5.86	0.634	148.49	52.638	0.821	755.59	516.785	0.00108657
SN3-29	420.35	366.09	76.27	2051.91	0.079	0.071	0.058	0.239	0.41	0.0235	2.99	1.892	15.95	2.304	5.38	0.899	6.34	0.577	152.28	58.4671	0.926	833.34	533.832	0.00111119
ZKW-01	7.14	2057.44	24.43	1584.67	0.127	0.117	0.05	0.35	0.42	0.031	1.14	0.142	0.4	0.068	0.47	0.197	3.28	0.564	220.33	42.9293	5	972.8	38.926	0.0051398
ZKW-02	0.89	479.71	5.17	261.36	0.091	0.136	0.108	0.62	0.42	0.078	1.15	0.118	0.65	0.079	0.34	0.08	1.08	0.117	32.04	9.33939	1.55	204.48	11.127	0.0075802
ZKW-03	0.78	492.53	3.46	586.03	0.115	0.12	0.084	0.28	0.145	0.086	0.86	0.137	0.35	0.093	0.31	0.124	1.95	0.297	60.69	9.80095	1.74	288.76	9.191	0.00602577
ZKW-04	0.84	398.21	7.32	439.63	0.1	0.132	0.076	0.68	0.51	0.116	1.13	0.155	0.85	0.153	0.85	0.25	3.36	0.457	51.11	11.0879	1.71	314.58	16.979	0.00543582
ZKW-05	1.96	607.42	3.87	1972.28	0.127	0.117	0.05	0.35	0.42	0.031	1.14	0.142	0.4	0.068	0.47	0.197	3.28	0.564	197.15	17.7897	2.13	462.09	13.186	0.00460949
ZKW-06	1.3	580.25	1.9	268.52	0.243	0.288	0.163	0.71	0.72	0.155	1.76	0.193	0.64	0.103	0.29	0.113	1.3	0.18	28.25	5.707	1.207	160.16	10.058	0.00753621
ZKW-07	6.33	2423.15	55.95	4626.77	0.172	0.217	0.132	0.68	0.69	0.148	1.59	0.255	0.61	0.08	0.243	0.054	0.57	0.172	527.65	180.365	43.71	5668.76	67.893	0.00771068
ZKW-08	1.16	547.15	0.83	170.57	0.191	0.159	0.061	0.78	0.92	0.153	1.44	0.162	0.34	0.117	0.178	0.056	0.59	0.152	25.8	5.14506	1.115	142.06	7.289	0.0078488
ZKW-09	1	575.13	5.23	119.2	0.164	0.153	0.083	0.239	0.49	0.074	1.12	0.13	0.56	0.106	0.51	0.155	1.83	0.251	19.9	1.92841	0.195	43.4	12.095	0.00449309
ZKW-10	1.4	3236.04	11.12	2396.82	0.201	0.279	0.134	0.49	0.81	0.106	1.88	0.246	1.51	0.235	0.77	0.256	3.18	0.419	218.56	133.32	20.8	2974.79	23.036	0.00699209
ZKW-11	1.09	692.56	4.21	892.6	0.16	0.192	0.135	0.55	0.32	0.12	1.32	0.162	0.63	0.102	0.37	0.106	1.59	0.236	89.96	30.9313	6.55	886.9	11.293	0.00738527
ZKW-12	1.61	769.05	8.53	1180.88	0.231	0.278	0.119	0.79	1.04	0.274	1.92	0.195	0.99	0.175	0.61	0.23	2.55	0.374	122.88	35.3138	4.96	909.14	19.916	0.00545571
ZKW-13	1	626.18	4.39	796.49	0.151	0.121	0.09	0.42	0.49	0.13	1.59	0.201	0.64	0.111	0.41	0.154	1.74	0.232	80.85	23.2897	4.13	663.58	11.87	0.00622382
ZKW-14	1.18	565.1	1.22	1286.82	0.172	0.217	0.132	0.68	0.69	0.148	1.59	0.255	0.61	0.08	0.243	0.054	0.57	0.172	251.18	12.2424	1.044	309.45	8.013	0.00337373
ZKW-15	1.14	488.27	3.16	215.62	0.087	0.139	0.095	0.244	0.64	0.151	1.15	0.155	0.41	0.091	0.3	0.099	1.49	0.226	19.38	4.31414	0.585	104.16	9.577	0.00561636
ZKW-16	0.82	555.57	2.9	239.34	0.129	0.115	0.099	0.098	0.67	0.111	1.13	0.162	0.49	0.085	0.242	0.104	1.45	0.216	22.77	3.85788	0.43	93.55	8.821	0.00459647
ZKW-17	0.96	473.48	2.14	228.2	0.095	0.138	0.051	0.206	0.48	0.11	0.85	0.112	0.34	0.084	0.209	0.08	1.32	0.187	23.31	3.79528	0.834	100.4	7.362	0.00830677
ZKW-18	0.92	520.12	3.91	148.39	0.127	0.156	0.07	0.33	0.47	0.125	1.33	0.171	0.42	0.087	0.33	0.092	1.56	0.223	14.09	3.54956	0.658	91.07	10.321	0.00722521
ZKW-19	0.77	486.95	5.15	345.08	0.128	0.164	0.102	0.39	0.32	0.121	1.03	0.12	0.73	0.097	0.24	0.083	0.83	0.099	46.35	7.49919	1.75	240.39	10.374	0.00727984
ZKW-20	0.98	458.57	2.32	204.23	0.173	0.131	0.065	0.266	0.31	0.142	1.13	0.169	0.36	0.089	0.27	0.073	0.6	0.149	27.78	3.70983	1.3	99.09	7.227	0.0131194
ZKW-21	1.01	492.12	1.78	153.87	0.134	0.122	0.105	0.35	0.5	0.17	1.12	0.151	0.33	0.062	0.152	0.088	0.7	0.11	19.2	3.14719	0.556	80.09	6.884	0.00694219
ZKW-22	0.93	1425.23	4.94	891.61	0.181	0.186	0.083	0.48	0.56	0.121	1.48	0.17	0.6	0.1	0.29	0.211	2.66	0.355	75.83	21.2732	2.69	502.25	13.347	0.0053559
ZKW-23	1.33	624.12	6.72	1218.39	0.201	0.197	0.17	0.46	0.38	0.201	1.89	0.266	0.59	0.144	0.55	0.227	2.87	0.378	112.58	38.1064	4.76	972.17	16.574	0.00489626
ZKW-24	10.25	3830.92	101.48	7489.97	0.172	0.217	0.132	0.68	0.69	0.148	1.59	0.255	0.61	0.08	0.243	0.054	0.57	0.172	891.28	252.54	27.89	6680.16	117.343	0.00417505
DDB-01	1.02	713.63	7.36	695.86	0.161	0.158	0.084	0.56	0.33	0.15	1.49	0.193	1.07	0.196	0.64	0.145	1.88	0.286	52.93	6.03001	0.93	159.05	15.723	0.00584722
DDB-02	1.19	762.39	5.9	602.2	0.149	0.12	0.155	0.52	0.7	0.16	1.7	0.154	0.79	0.162	0.64	0.152	1.22	0.205	48.25	4.14594	0.569	107.35	13.917	0.00530042
DDB-03	1.1	575.59	31.56	1402.15	0.146	0.175	0.101	0.41	0.48	0.09	1.73	0.74	5.59	1.022	3.26	0.728	6.29	0.806	80.94	108.085	25.32	3249.46	54.228	0.00779206
DDB-04	2.01	487.92	31.09	1501.29	0.141	0.482	0.106	0.43	0.46	0.135	1.61	0.56	6.49	1.08	3.6	0.769	7.16	0.93	82.15	167.175	69.82	5690.65	57.053	0.0122692
DDB-05	1.23	909.88	6.58	730.84	0.158	0.144	0.101	0.51	0.34	0.023	1.46	0.197	0.86	0.211	0.77	0.149	2.46	0.381	57.14	11.2741	1.98	305.02	15.574	0.00649138
DDB-06	1.8	700.78	8.29	848.29	0.215	0.195	0.195	0.8	0.47	0.276	1.87	0.216	1.2	0.178	0.84	0.262	2.84	0.455	67.19	27.1489	4.65	498.89	20.102	0.00932069
DDB-07	2.2	969.8	16.02	6571.73	0.38	0.29	0.161	0.93	1.33	0.5	2.25	0.39	1.62	0.29	0.82	0.21	2	0.45	878.44	75.4592	15.43	2239.57	29.841	0.00688972
DDB-08	2.5	799.29	31.16	2370.67	0.145	0.179	0.095	0.45	0.74	0.139	1.62	0.55	4.91	0.869	2.7	0.603	5.69	0.758	138.41	49.4839	11.4	1327.04	53.108	0.00859055
DDB-09	1.4	798.02	24.73	2185.08	0.132	0.171	0.111	0.32	0.65	0.141	1.47	0.459	4.01	0.627	2.02	0.452	4.19	0.521	141.45	42.1076	10.51	1072.06	41.404	0.00980356
DDB-10	1	555.98	13.46	912.2	0.139	0.136	0.093	0.135	0.48	0.089	1.19	0.23	2.18	0.366	1.39	0.37	3.53	0.471	66.14	19.3184	4.77	595.81	25.259	0.00800591
DDB-11	1.48	568.78	15.04	979.58	0.108	0.134	0.071	0.41	0.28	0.073	0.97	0.226	2.47	0.439	1.5	0.382	3.85	0.525	62.75	26.6409	6.7	834.99	27.958	0.00802405
DDB-12	1.58	518.2	36.92	1837.44	0.16	0.205	0.102	0.51	0.69	0.129	1.57	0.767	6.96	1.17	3.75	0.855	7.74	0.88	113.93	110.815	29.1	3270.5	63.988	0.00889772
DDB-13	2.24	573.76	18.95	4020.45	0.17	0.269	0.144	0.64	0.87	0.305	2	0.349	3.46	0.48	1.74	0.402	4.5	0.55	362.53	45.3302	8.51	1032.01	37.069	0.00824604
DDB-14	1.71	647.31	26.26	4565.26	0.144	0.245	0.157	0.81	0.95	0.252	1.86	0.39	4.33	0.702	2.29	0.604	5.84	0.77	395.24	73.1636	15.47	1642.25	47.314	0.00942
DDB-15	1.28	586.08	7.47	485.67	0.135	0.176	0.114	0.57	0.39	0.178	1.56	0.217	1.14	0.203	0.62	0.194	1.8	0.242	48.31	5.63101	1.072	162.64	16.289	0.00659124
DDB-16	0.89	529.1	17	1064.39	0.127	0.147	0.107	0.28	0.56	0.172	1.53	0.301	2.59	0.449	1.61	0.422	4.33	0.511	80.71	18.8412	4.55	619.06	31.026	0.00734985
DDB-17	1.79	966.42	15.76	4564.75	0.267	0.6	0.211	0.65	0.54	0.143	2.19	0.433	2.19	0.256	0.59	0.196	1.3	0.193	673.28	122.33	64.83	3730.96	27.309	0.0173762
DDB-18	1.75	1036.54	21.46	3443.02	0.306	0.265	0.228	0.23	0.58	0.35	2.29	0.53	3.35	0.38	0.95	0.226	1.55	0.224	527.52	146.249	46.17	3956.07	34.669	0.0116707
DDB-19	2.07	1301	15.29	3010.99	0.28	0.34	0.2	0.52	0.61	0.034	2.79	0.33	2.61	0.259	0.58	0.128	1.12	0.233	507.29	130.699	40.58	3212.59	27.394	0.0126316
HND-01	1.16	731.23	8.36	1988.99	0.111	0.565	0.077	0.65	0.61	0.161	0.95	0.134	1.61	0.151	0.317	0.087	0.33	0.11	191.37	27.3778	17.91	946.95	15.383	0.0189134
HND-02	1.26	762.2	8.1	2106.34	0.093	0.6105	0.046	0.261	0.31	0.081	1.14	0.197	1.73	0.19	0.317	0.07	0.448	0.089	206.12	23.468	17.53	978.34	14.9425	0.0179181
HND-03	1.13	732.92	8.98	1939.36	0.097	1.081	0.072	0.168	0.27	0.046	0.81	0.271	2.17	0.213	0.448	0.045	0.5	0.064	191.9	28.9011	17.39	966.58	16.365	0.0179913
HND-04	1.44	768.92	11.23	2323.7	0.079	0.512	0.06	0.3	0.4	0.076	0.95	0.308	2.03	0.257	0.49	0.055	0.59	0.068	222.52	34.2789	24.46	1263.7	18.845	0.0193559
HND-05	1.76	750.67	10.46	2503.3	0.095	0.71	0.091	0.3	0.29	0.077	0.7	0.262	1.62	0.259	0.5	0.072	0.655	0.097	237.39	37.75	26.75	1405.87	17.948	0.0190274
HND-06	1.28	754.97	9.54	2070.09	0.112	0.711	0.075	0.165	0.43	0.072	0.8	0.216	1.66	0.212	0.438	0.046	0.452	0.069	200.42	26.7452	22.34	1098.42	16.278	0.0203383
HND-07	1.05	742.06	10.19	2155.78	0.084	0.6116	0.105	0.189	0.43	0.057	0.97	0.34	2.08	0.167	0.411	0.082	0.738	0.062	206.67	29.1762	24.16	1196.3	17.5666	0.0201956
HND-08	1.41	757.67	13.54	1996.15	0.123	0.5101	0.057	0.27	0.44	0.102	1.22	0.344	2.55	0.3	0.608	0.081	0.71	0.079	193.88	26.7164	22.52	1071.67	22.3441	0.0210139
HND-09	1.24	742.57	10.97	1645.65	0.093	0.6104	0.084	0.173	0.53	0.053	0.88	0.398	2.26	0.206	0.5	0.083	0.479	0.079	144.63	29.328	20.89	1155.87	18.6384	0.018073
HND-10	1.74	656.44	10.63	2212.44	0.059	0.628	0.07	0.41	0.47	0.044	0.84	0.232	1.79	0.194	0.625	0.075	0.44	0.077	206.73	31.1155	20.99	1181.3	18.324	0.0177686
HND-11	1.07	737.97	6.08	996.74	0.125	0.749	0.075	0.25	0.41	0.077	0.81	0.169	1.12	0.085	0.202	0.056	0.235	0.079	110.01	20.4988	15.69	341.56	11.592	0.0459363
HND-12	1.65	747.71	9.15	3052.34	0.069	0.5101	0.065	0.29	0.34	0.104	0.94	0.238	1.72	0.148	0.327	0.075	0.413	0.07	321.11	21.5979	14.63	857.77	16.1091	0.0170559
HND-13	1.98	755.44	10.57	3080.38	0.098	0.967	0.068	0.16	0.42	0.086	0.87	0.226	1.59	0.149	0.324	0.096	0.546	0.072	334.92	27.5532	14.63	884.96	18.222	0.0165318
HND-14	1.27	772.62	10.5	2438.61	0.099	0.556	0.075	0.217	0.4	0.095	0.76	0.26	2.03	0.195	0.32	0.109	0.544	0.069	236.12	33.9373	25.82	1309.24	17.499	0.0197214
HND-15	1.53	785.92	11.46	2410.83	0.102	0.874	0.06	0.217	0.368	0.046	1.02	0.311	2.01	0.228	0.503	0.09	0.4	0.077	233.01	38.7976	23.52	1249.09	19.296	0.0188297
HND-16	1.63	746.23	10.43	2264.89	0.086	0.477	0.041	0.237	0.262	0.115	0.81	0.261	2.08	0.208	0.542	0.048	0.62	0.069	216.01	35.3973	21.67	1199.72	17.916	0.0180625
HND-17	0.72	755.61	6.07	1017.49	0.098	0.537	0.037	0.44	0.233	0.0283	0.7	0.17	1.06	0.12	0.148	0.052	0.359	0.081	111.71	23.1895	12.49	349.65	10.8533	0.0357214
HND-18	1.11	769.5	17.34	2030.1	0.174	1.2	0.08	0.35	0.31	0.101	1.01	0.41	2.71	0.361	0.825	0.144	1.02	0.088	198.56	55.996	26.83	1158.39	27.233	0.0231615
HND-19	1.13	786.23	13.02	2187.39	0.179	1.791	0.064	0.263	0.3	0.081	0.98	0.323	2.59	0.284	0.535	0.089	0.858	0.09	211.01	45.8776	28.88	1245.11	22.577	0.0231947
HND-20	1.14	789.54	10.09	1638.88	0.097	0.5135	0.058	0.34	0.32	0.037	0.83	0.305	1.68	0.175	0.447	0.06	0.493	0.074	146.63	29.1726	21.07	1149.21	16.6595	0.0183343
HND-21	1.36	758.41	10.6	1729.5	0.052	0.494	0.094	0.193	0.32	0.084	0.98	0.256	2.21	0.218	0.284	0.067	0.419	0.078	151.49	33.0754	24.95	1332.32	17.709	0.0187267
RL2-01	6.79	852.47	6.7	612.71	0.155	0.182	0.115	0.36	0.66	0.052	1.35	0.218	1.54	0.217	0.67	0.11	0.72	0.235	165.09	5.83908	4.61	228.76	20.074	0.0201521
RL2-02	17.27	674.64	6.25	476.78	0.137	0.178	0.116	0.244	0.39	0.18	1.27	0.191	1.05	0.144	0.42	0.134	1.54	0.292	69.32	5.45606	4.62	214.14	29.806	0.0215747
RL2-03	16.75	749.79	5.93	422.58	0.12	0.152	0.093	0.34	0.48	0.074	1.23	0.154	1.09	0.139	0.47	0.119	1.5	0.37	56.33	5.78227	4.4	219.83	29.011	0.0200155
RL2-04	5.72	876.5	12.04	502.23	0.137	0.29	0.055	0.52	0.35	0.057	1.75	0.44	2.57	0.272	0.44	0.084	0.96	0.145	77.49	6.41546	4.77	229.99	25.83	0.02074
RL2-05	5.94	849.89	17.25	1206.61	0.168	0.27	0.13	0.355	0.71	0.104	1.65	1.07	5.34	0.349	0.48	0.124	0.69	0.14	200.06	17.6023	13.15	498.03	34.77	0.026404
RL2-06	6.85	835.25	10.71	634.12	0.155	0.124	0.062	0.253	0.42	0.111	1.16	0.328	2.16	0.224	0.5	0.091	0.86	0.129	107.64	9.49743	8.67	342.31	24.137	0.0253279
RL2-07	5.87	850.98	19.27	539.26	0.105	0.216	0.099	0.55	0.3	0.113	1.28	0.277	2.85	0.34	0.81	0.208	1.7	0.225	90.59	9.22914	4.89	223.8	34.213	0.0218499
RL2-08	24.4	792.62	9.32	629.7	0.101	0.172	0.066	0.49	0.36	0.068	1.21	0.159	1.82	0.188	0.974	0.216	2.05	0.47	95.79	6.58696	6.37	247.75	42.064	0.0257114
RL2-09	16.95	797.61	5.91	382.07	0.106	0.104	0.078	0.259	0.74	0.114	1.03	0.148	0.98	0.129	0.56	0.089	1.04	0.14	51.31	5.22035	3.8	197.56	28.377	0.0192347
RL2-10	16.97	761.35	5.83	380.1	0.101	0.111	0.105	0.247	0.58	0.077	1.38	0.152	0.92	0.142	0.477	0.114	1.32	0.168	49.96	5.09713	3.81	202.27	28.694	0.0188362
RL2-11	18.15	703.47	7.17	416.99	0.132	0.123	0.071	0.46	0.41	0.063	0.87	0.174	1.07	0.159	0.49	0.152	1.43	0.247	52.24	5.44942	4.5	213.79	31.171	0.0210487
RL2-12	27.8	811.55	11.45	669.37	0.093	0.112	0.068	0.39	0.37	0.055	1.04	0.31	2.18	0.317	1.15	0.218	2.88	0.616	94.53	7.05825	6.06	276.49	49.049	0.0219176
RL2-13	6.28	868.85	7.92	539.28	0.11	0.179	0.093	0.47	0.54	0.083	1.26	0.292	2.51	0.27	0.41	0.075	0.67	0.091	95.37	8.92819	6.17	259.12	21.253	0.0238114
RL2-14	7.63	789.55	23.32	1661.24	0.163	0.29	0.12	0.92	0.74	0.124	2.34	1.259	6.23	0.524	1.33	0.198	1.4	0.169	318.53	21.3387	14.74	656.5	46.757	0.0224524
RL2-15	13.77	733.49	6.38	402.75	0.125	0.155	0.08	0.33	0.38	0.124	1.06	0.162	0.88	0.154	0.361	0.118	0.99	0.243	52.32	5.40364	4.34	208.12	25.312	0.0208534
RL2-16	4.81	749.83	17.83	906.48	0.075	0.138	0.055	0.259	0.43	0.139	1.02	0.72	3.74	0.272	0.786	0.134	0.74	0.113	145.38	8.87454	5.46	297.43	31.261	0.0183573
RL2-17	6.87	696.56	11.6	396.09	0.13	0.128	0.086	0.45	0.28	0.125	1	0.38	2.52	0.279	0.73	0.102	1.04	0.175	67.05	6.40362	8.88	217.35	25.895	0.0408558
RL2-18	9.33	783.28	18.35	1652.26	0.127	0.2641	0.076	0.25	0.59	0.111	2.76	0.792	4.1	0.332	0.37	0.111	0.67	0.147	228.27	38.1645	35.68	1211.92	38.3801	0.0294409
RL2-19	6.98	817.92	14.64	1033.7	0.101	0.162	0.099	0.57	0.67	0.088	1.46	0.734	3.7	0.276	0.84	0.098	1.01	0.183	188.69	20.6919	25.88	691.13	31.611	0.0374459
RL2-20	12.67	780.32	9.08	639.31	0.161	0.133	0.106	0.43	0.29	0.077	1.14	0.187	1.52	0.209	0.31	0.106	0.98	0.116	88.2	8.93206	7.93	333.06	27.515	0.0238095
RL2-21	5.77	709.27	35.05	2104.56	0.194	0.25971	0.118	0.53	1.23	0.182	3.3	1.46	7.53	0.613	1.23	0.243	2.1	0.332	375.7	34.3206	20.18	1243.41	60.1417	0.0162296
Note:
Pb (μg g-1)= 204Pb (μg g-1) + 206Pb (μg g-1) +207Pb (μg g-1) + 208Pb (μg g-1)
