# Supplementary material for: Characterization of reference materials for in situ U–Pb dating of columbite group minerals by LA-ICP-MS
Source: Royal Society of Chemistry journal article supplement (doi:10.1039/d3ja00162h), 2023-01-01
Supplement: d3ja00162h3.xlsx [file d3ja00162h3.xlsx]

## Sheet: Sheet1
Table S3 Individual in situ U-Pb data of investigated samples in this study.
Sample	Pb a	Th	U	Th/U		Data for Tera-Wasserburg plot				Data for Wetherill plot					f206 b (%)	207Pb-corrected (Ma)
	(μg g-1)					238U/206Pb	2s	207Pb/206Pb	2s	207Pb/235U	2s	206Pb/238U	2s		(%)	206Pb/238U	2s	2ssys c
CT3-01	222.384	0.04	373.77	0.000107018		2.68479	0.0510334	0.12834	0.00228	6.5921	0.0781	0.372468	0.00708		0.208001	2065.02	31.18	51.7486
CT3-02	206.457	0.048	354.28	0.000135486		2.6569	0.0494138	0.12945	0.00222	6.59844	0.07232	0.376379	0.007		0.334016	2080.05	29.92	51.243
CT3-03	208.72	0.03	379.96	7.89557e-05		2.67771	0.0497607	0.12575	0.00216	6.51545	0.0699	0.373453	0.00694		0	2029.1	30.12	50.5383
CT3-04	165.24	0.046	311.3	0.000147767		2.64494	0.0513486	0.12625	0.00232	6.58191	0.08372	0.37808	0.00734		0	2036.17	32.28	51.9653
CT3-05	214.919	0.034	386.83	8.78939e-05		2.64578	0.049141	0.12852	0.00218	6.59804	0.07108	0.377961	0.00702		0.228436	2067.51	29.78	50.9577
CT3-06	221.073	0.0209	405.47	5.15451e-05		2.68989	0.0499252	0.12775	0.00216	6.54858	0.06916	0.371762	0.0069		0.14102	2056.86	29.78	50.7851
CT3-07	221.831	0.028	400.96	6.98324e-05		2.6448	0.0492447	0.1269	0.00216	6.61556	0.0704	0.3781	0.00704		0.0445219	2045.12	29.88	50.654
CT3-08	227.862	0.049	412.74	0.000118719		2.63116	0.049015	0.12768	0.00216	6.59083	0.07046	0.38006	0.00708		0.133073	2055.97	29.72	50.7354
CT3-09	221.584	0.0246	408.57	6.021e-05		2.66925	0.0498742	0.12577	0.00214	6.52639	0.0691	0.374637	0.007		0	2029.5	29.92	50.4258
CT3-10	200.283	0.046	355.67	0.000129333		2.64906	0.0502453	0.12653	0.00222	6.58507	0.07498	0.377493	0.00716		0.0025169	2039.95	30.72	51.0713
CT3-11	204.903	0.052	378.9	0.000137239		2.67564	0.0502566	0.12882	0.00222	6.63786	0.07218	0.373742	0.00702		0.262494	2071.59	30.04	51.1761
CT3-12	233.354	0.0259	410.17	6.31445e-05		2.66415	0.0505357	0.12753	0.00222	6.59978	0.07488	0.375354	0.00712		0.116044	2053.98	30.62	51.2359
CT3-13	209.78	0.054	391.39	0.00013797		2.68522	0.0507614	0.12643	0.00218	6.51152	0.0721	0.372409	0.00704		0	2038.75	30.4	50.8603
CT3-14	196.994	0.058	361.51	0.000160438		2.64543	0.0502478	0.13009	0.00226	6.57944	0.07612	0.37801	0.00718		0.406673	2088.7	30.36	51.6411
CT3-15	215.059	0.043	386.47	0.000111263		2.6684	0.0509817	0.12814	0.00224	6.62016	0.07536	0.374757	0.00716		0.185296	2062.24	30.62	51.3684
CT3-16	218.334	0.04	391.3	0.000102223		2.66733	0.0510834	0.12474	0.0022	6.547	0.07468	0.374906	0.00718		0	2014.97	31	50.8434
CT3-17	213.236	0.0361	399.72	9.03132e-05		2.66649	0.0507664	0.12821	0.00222	6.62857	0.074	0.375025	0.00714		0.193242	2063.23	30.36	51.2299
CT3-18	206.428	0.06	385.44	0.000155666		2.64871	0.050653	0.12694	0.00222	6.60699	0.07478	0.377543	0.00722		0.049063	2045.82	30.58	51.0812
CT3-19	243.208	0.03	429.83	6.9795e-05		2.65206	0.0506407	0.1261	0.0022	6.55455	0.07424	0.377065	0.0072		0	2033.98	30.64	50.9278
CT3-20	232.905	0.054	399.69	0.000135105		2.66811	0.0522522	0.1286	0.00234	6.64432	0.08224	0.374797	0.00734		0.237518	2068.51	31.72	52.131
CT3-21	228.713	0.082	389.57	0.000210488		2.65311	0.0523702	0.12874	0.00236	6.58897	0.08564	0.376916	0.00744		0.253412	2070.4	32.22	52.4666
Buranga-01	33.2204	0.267	158.43	0.00168529		6.63394	0.156673	0.06985	0.00208	1.45184	0.03682	0.15074	0.00356		0.0769749	904.46	22.9288	29.2053
Buranga-02	33.673	0.237	161.24	0.00146986		6.64673	0.146674	0.07004	0.00176	1.45294	0.02986	0.15045	0.00332		0.09982	902.644	21.3844	27.9857
Buranga-03	15.4894	0.057	78.33	0.000727691		6.6379	0.145404	0.06821	0.00172	1.41698	0.02946	0.15065	0.0033		0	905.62	21.2556	27.926
Buranga-04	31.7847	0.258	161.11	0.00160139		6.63658	0.138299	0.0704	0.00148	1.44262	0.0234	0.15068	0.00314		0.143105	903.566	20.2259	27.123
Buranga-05	131.489	2.92	627.21	0.00465554		6.63262	0.143413	0.06971	0.00164	1.44924	0.02742	0.15077	0.00326		0.0601417	904.77	20.9982	27.7195
Buranga-06	389.724	141.87	2266.32	0.0625993		6.61857	0.139301	0.07064	0.00154	1.44163	0.02484	0.15109	0.00318		0.171962	905.615	20.4833	27.3427
Buranga-07	179.412	82.7	1799.26	0.0459633		6.61901	0.135815	0.07082	0.00144	1.44533	0.0223	0.15108	0.0031		0.193605	905.376	19.9684	26.9559
Buranga-08	190.435	68.81	1641.06	0.0419302		6.62427	0.14393	0.06988	0.00176	1.45439	0.02978	0.15096	0.00328		0.080582	905.661	21.1269	27.8287
Buranga-09	250.951	116.9	1955.43	0.0597822		6.60633	0.136168	0.0702	0.00148	1.46514	0.0234	0.15137	0.00312		0.119058	907.629	20.0971	27.0816
Buranga-10	233.417	68.08	1468.71	0.0463536		6.60808	0.137113	0.07054	0.00156	1.44181	0.02506	0.15133	0.00314		0.159939	907.059	20.2259	27.1696
Buranga-11	199.491	86.49	1684.64	0.0513403		6.61594	0.142693	0.07075	0.00174	1.44446	0.02948	0.15115	0.00326		0.185188	905.839	20.9982	27.7334
Buranga-12	159.636	64.11	1613.02	0.0397453		6.59848	0.14194	0.06866	0.00168	1.43471	0.02836	0.15155	0.00326		0	910.207	20.9982	27.7906
Buranga-13	158.259	61	1621.61	0.0376169		6.61201	0.133779	0.06919	0.0014	1.44273	0.02158	0.15124	0.00306		-0.00238171	907.931	19.711	26.8003
Buranga-14	144.051	0.036	273.18	0.000131781		6.62866	0.134454	0.06857	0.00142	1.42617	0.02216	0.15086	0.00306		0	906.432	19.711	26.78
Buranga-15	137.936	0.054	263.98	0.000204561		6.61551	0.139172	0.07076	0.00166	1.44457	0.0276	0.15116	0.00318		0.186391	905.885	20.4833	27.3462
Buranga-16	137.166	0.0164	255.27	6.42457e-05		6.62076	0.14027	0.06877	0.00166	1.43204	0.0279	0.15104	0.0032		0	907.238	20.612	27.4607
Buranga-17	134.594	0.0189	251.9	7.50298e-05		6.62603	0.144006	0.07047	0.00182	1.46624	0.03124	0.15092	0.00328		0.151522	904.837	21.1269	27.818
Buranga-18	136.986	0.034	249.62	0.000136207		6.64011	0.142855	0.0691	0.00176	1.43472	0.02962	0.1506	0.00324		0	904.437	20.8695	27.6177
Buranga-19	110.884	0.042	201.66	0.000208271		6.61682	0.161119	0.06943	0.00232	1.44667	0.04198	0.15113	0.00368		0.0264752	907.07	23.701	29.8471
Buranga-20	135.962	0.0189	246.58	7.66486e-05		6.60808	0.144973	0.07038	0.00188	1.45833	0.0326	0.15133	0.00332		0.140701	907.222	21.3844	28.0448
Buranga-21	134.344	0.0293	247.18	0.000118537		6.59022	0.135505	0.06988	0.00156	1.46192	0.0252	0.15174	0.00312		0.080582	910.025	20.0971	27.1137
Rongi-01	14.2549	0.123	79.21	0.00155283		6.58155	0.160272	0.06883	0.00224	1.44183	0.04084	0.15194	0.0037		0	912.217	23.8297	30.0118
Rongi-02	15.005	0.12	81.04	0.00148075		6.61376	0.152221	0.0697	0.00198	1.45294	0.03464	0.1512	0.00348		0.0589393	907.188	22.414	28.8372
Rongi-03	14.9944	0.135	85.24	0.00158376		6.63922	0.16662	0.07151	0.00242	1.48499	0.04358	0.15062	0.00378		0.276569	902.104	24.3444	30.3013
Rongi-04	15.8319	0.096	85.24	0.00112623		6.61288	0.168799	0.06843	0.00224	1.43604	0.04048	0.15122	0.00386		0	908.592	24.8592	30.7928
Rongi-05	5.34307	0.0252	37.24	0.000676692		6.61201	0.237829	0.0744	0.0044	1.55135	0.08344	0.15124	0.00544		0.624055	902.623	35.0209	39.3999
Rongi-06	16.5034	0.148	92.43	0.00160121		6.6177	0.172548	0.06932	0.00228	1.44427	0.04158	0.15111	0.00394		0.0132491	907.07	25.3739	31.1921
Rongi-07	17.4737	0.16	98	0.00163265		6.59413	0.161755	0.06885	0.00224	1.4394	0.04062	0.15165	0.00372		0	910.573	23.9584	30.0942
Rongi-08	16.5111	0.134	92.04	0.00145589		6.63394	0.156673	0.07098	0.00208	1.47522	0.03678	0.15074	0.00356		0.212843	903.313	22.9288	29.1911
Rongi-09	15.5949	0.101	85.2	0.00118545		6.63086	0.160924	0.06894	0.00218	1.43351	0.03916	0.15081	0.00366		0	905.776	23.5723	29.7292
Rongi-10	14.7304	0.108	83.68	0.00129063		6.60982	0.164273	0.07239	0.00236	1.51001	0.0426	0.15129	0.00376		0.382378	904.951	24.2158	30.2321
Rongi-11	17.8259	0.136	98.89	0.00137527		6.6107	0.154703	0.0688	0.00202	1.43492	0.0356	0.15127	0.00354		0	908.496	22.8001	29.1546
Rongi-12	16.2519	0.132	90.55	0.00145776		6.62691	0.170394	0.07171	0.00252	1.4919	0.04598	0.1509	0.00388		0.300616	903.465	24.9879	30.8365
Rongi-13	18.1549	0.161	102.12	0.00157658		6.57765	0.166139	0.07224	0.00242	1.5141	0.04412	0.15203	0.00384		0.364342	909.232	24.7305	30.6966
Rongi-14	18.3389	0.16	101.58	0.00157511		6.56254	0.174852	0.07459	0.00274	1.5671	0.05068	0.15238	0.00406		0.6469	908.774	26.1459	31.8427
Rongi-15	15.476	0.125	84.43	0.00148052		6.63086	0.161803	0.06962	0.00218	1.44763	0.039	0.15081	0.00368		0.0493203	905.086	23.701	29.823
Rongi-16	18.7761	0.138	101.21	0.0013635		6.59674	0.170587	0.06862	0.00242	1.43419	0.04438	0.15159	0.00392		0	910.472	25.2452	31.1272
Rongi-17	16.3588	0.118	88.9	0.00132733		6.59022	0.154614	0.07243	0.0021	1.51546	0.0371	0.15174	0.00356		0.387187	907.42	22.9288	29.242
Rongi-18	16.9103	0.167	92.49	0.0018056		6.65159	0.164586	0.06926	0.0023	1.43576	0.0416	0.15034	0.00372		0.0060349	902.818	23.9584	30.0006
Rongi-19	19.3936	0.188	105.56	0.00178098		6.60589	0.155351	0.07268	0.0021	1.51699	0.03702	0.15138	0.00356		0.417246	905.157	22.9288	29.214
Rongi-20	4.87409	0.0298	28.77	0.0010358		6.45619	0.207496	0.08374	0.00479234	1.78835	0.0874656	0.15489	0.00497802		1.74707	913.194	32.0505	36.8891
Rongi-21	2.97626	0.0228	23.53	0.000968976		6.62296	0.212787	0.06995	0.00438	1.4564	0.0813834	0.15099	0.00485112		0.09	905.758	31.2345	36.1075
Coltan139-01	168.383	60.61	1657.51	0.0365669		12.0831	0.239443	0.06113	0.00112	0.6976	0.00886	0.08276	0.00164		0.461903	510.3	10.5678	14.6915
Coltan139-02	187.634	99.58	1752.51	0.0568214		12.0525	0.241138	0.06274	0.00118	0.71783	0.00956	0.08297	0.00166		0.659982	510.566	10.6966	14.7881
Coltan139-03	168.562	64.65	1583.71	0.0408219		12.0135	0.239576	0.06182	0.00116	0.70958	0.0094	0.08324	0.00166		0.546794	512.724	10.6966	14.818
Coltan139-04	165.987	61.72	1673.22	0.036887		12.1803	0.243309	0.05838	0.00112	0.66094	0.00906	0.0821	0.00164		0.12357	508.041	10.5678	14.6602
Coltan139-05	168.99	65.28	1637.61	0.039863		12.0992	0.240081	0.06002	0.00112	0.68402	0.00896	0.08265	0.00164		0.32534	510.32	10.5678	14.6918
Coltan139-06	167.045	60.31	1644.93	0.0366642		12.1996	0.241104	0.05839	0.00106	0.6599	0.00846	0.08197	0.00162		0.1248	507.261	10.439	14.5567
Coltan139-07	166.064	59.43	1603.77	0.0370564		12.1492	0.242069	0.0577	0.00106	0.65477	0.00838	0.08231	0.00164		0.0399091	509.701	10.5678	14.6832
Coltan139-08	171.676	62.2	1638.73	0.0379562		12.213	0.241635	0.05811	0.00104	0.65597	0.00822	0.08188	0.00162		0.0903516	506.894	10.439	14.5516
Coltan139-09	174.023	62.22	1676.89	0.0371044		12.1462	0.241951	0.05786	0.0011	0.6568	0.00902	0.08233	0.00164		0.059594	509.723	10.5678	14.6835
Coltan139-10	168.492	61.48	1653.53	0.0371811		12.2279	0.245216	0.05837	0.0011	0.65815	0.0089	0.08178	0.00164		0.122339	506.142	10.5678	14.6339
Coltan139-11	164.752	63.32	1705.54	0.0371261		12.161	0.26916	0.0581	0.00162	0.65858	0.01522	0.08223	0.00182		0.0891213	508.983	11.7271	15.529
Coltan139-12	166.024	62.47	1703.6	0.0366694		12.2459	0.266932	0.05776	0.0015	0.65017	0.01386	0.08166	0.00178		0.0472909	505.793	11.4695	15.2932
Coltan139-13	158.801	62.07	1656.13	0.0374789		12.108	0.252158	0.05706	0.00128	0.64956	0.01146	0.08259	0.00172		0	511.755	11.0831	15.0861
Coltan139-14	156.152	60.68	1646.95	0.0368439		12.0351	0.25203	0.0568	0.00128	0.65053	0.01162	0.08309	0.00174		0	514.891	11.2119	15.2234
Coltan139-15	153.666	61.14	1611.47	0.0379405		12.2745	0.250099	0.05627	0.00114	0.63183	0.00956	0.08147	0.00166		0	505.552	10.6966	14.719
Coltan139-16	154.614	58.68	1607.86	0.0364957		12.1729	0.24894	0.05743	0.00112	0.65024	0.00938	0.08215	0.00168		0.00669091	508.91	10.8254	14.8589
Coltan139-17	152.816	61.03	1645.15	0.0370969		12.2339	0.260423	0.05777	0.0014	0.65098	0.01268	0.08174	0.00174		0.0485212	506.264	11.2119	15.1072
Coltan139-18	175.608	67.86	1687.55	0.0402121		12.1468	0.244925	0.06206	0.00114	0.71011	0.00896	0.0823261	0.00166		0.576322	507.165	10.6966	14.7412
Coltan139-19	228.665	120.73	1897.7	0.0636191		12.0402	0.243544	0.06969	0.00124	0.81434	0.00994	0.083055	0.00168		1.51504	506.838	10.8254	14.8305
Coltan139-20	177.461	82.86	1800.45	0.0460218		12.0842	0.251168	0.06438	0.00134	0.74046	0.01166	0.0827526	0.00172		0.861752	508.285	11.0831	15.0391
Coltan139-21	32.8788	0.263	159.78	0.00164601		12.1625	0.248516	0.0587	0.00132	0.66551	0.01174	0.08222	0.00168		0.162939	508.562	10.8254	14.8541
Coltan139-22	83.796	1.703	406.5	0.00418942		11.8649	0.236502	0.07818	0.00136	0.92414	0.01058	0.0842824	0.00168		2.55957	508.795	10.8254	14.8573
Coltan139-23	86.7311	1.647	415.95	0.00395961		11.1173	0.219997	0.12477	0.00208	1.59	0.01638	0.0899501	0.00178		8.29156	510.979	11.4695	15.362
Coltan139-24	95.5679	14.06	465.03	0.0302346		11.9893	0.238615	0.07288	0.00134	0.8526	0.01068	0.0834075	0.00166		1.90751	506.956	10.6966	14.7384
Coltan139-25	105.029	2.066	507.17	0.00407358		11.8726	0.281915	0.07633	0.00224	0.91072	0.0218	0.0842279	0.002		2.33197	509.62	12.8864	16.43
Coltan139-26	34.0165	0.259	163.86	0.00158062		12.1584	0.254262	0.0646	0.00148	0.7452	0.01326	0.0822476	0.00172		0.888819	505.169	11.0831	14.9971
Coltan139-27	165.491	74.88	1240.02	0.0603861		11.6631	0.220367	0.09822	0.0017	1.18525	0.01268	0.0857402	0.00162		5.0251	504.663	10.439	14.5205
Coltan139-28	155.407	65.22	1715.95	0.0380081		12.3092	0.278791	0.05701	0.00186	0.63875	0.01802	0.08124	0.00184		0	503.738	11.8559	15.5584
Coltan139-29	158.985	63.09	1665.54	0.0378796		12.0656	0.250397	0.06143	0.00164	0.70245	0.0153	0.08288	0.00172		0.498812	510.829	11.0831	15.0736
Coltan139-30	165.855	66.54	1714.23	0.0388163		12.2624	0.234572	0.05936	0.00124	0.66742	0.01014	0.08155	0.00156		0.24414	504.181	10.0525	14.2384
Coltan139-31	167.301	69.73	1699.77	0.0410232		12.1344	0.232647	0.06011	0.00124	0.68295	0.01012	0.08241	0.00158		0.336412	508.84	10.1813	14.3954
Coltan139-32	160.99	66.67	1713.33	0.0389125		12.1197	0.279088	0.05658	0.00194	0.64358	0.01914	0.08251	0.0019		0	511.568	12.2424	15.9548
Coltan139-33	165.053	66.66	1740.65	0.038296		12.1153	0.231915	0.06037	0.00118	0.68686	0.00932	0.08254	0.00158		0.3684	509.455	10.1813	14.4041
Coltan139-34	161.866	64.43	1720.16	0.0374558		12.1315	0.235477	0.06033	0.00124	0.68549	0.01032	0.08243	0.0016		0.363479	508.826	10.3101	14.4866
Coltan139-35	173.57	64.87	1722.51	0.0376602		12.1521	0.227419	0.05966	0.00108	0.6777	0.00822	0.08229	0.00154		0.281049	508.399	9.92366	14.208
Coltan139-36	175.959	66.04	1743.37	0.0378807		12.1359	0.229758	0.0587	0.00108	0.66766	0.00818	0.0824	0.00156		0.162939	509.633	10.0525	14.3158
Coltan139-37	168.87	66.9	1748.37	0.0382642		12.0525	0.229517	0.05898	0.00116	0.67501	0.00948	0.08297	0.00158		0.197388	512.851	10.1813	14.4522
Coltan139-38	178.505	63.35	1699.17	0.0372829		12.1832	0.225615	0.05818	0.00102	0.6584	0.00746	0.08208	0.00152		0.0989637	508.042	9.79483	14.1132
Coltan139-39	168.169	66.02	1784.51	0.0369962		12.2369	0.233597	0.05838	0.00118	0.65775	0.00968	0.08172	0.00156		0.12357	505.779	10.0525	14.2611
Coltan139-40	169.042	67.11	1754.88	0.0382419		12.2911	0.235669	0.05747	0.0012	0.64428	0.01004	0.08136	0.00156		0.0116121	504.179	10.0525	14.2384
Coltan139-41	170.914	66.59	1754.62	0.0379512		12.2026	0.226332	0.05884	0.0011	0.66438	0.0086	0.08195	0.00152		0.180164	506.872	9.79483	14.0963
Coltan139-42	163.535	64.18	1720.42	0.0373048		12.2714	0.228894	0.05709	0.00114	0.64118	0.0092	0.08149	0.00152		0	505.181	9.79483	14.072
Coltan139-43	165.825	64.08	1724.84	0.0371513		12.3001	0.232991	0.06058	0.00128	0.67885	0.0106	0.0813	0.00154		0.394237	501.967	9.92366	14.1162
Coltan139-44	161.315	62.71	1687.78	0.0371553		12.2444	0.227886	0.0575	0.00116	0.64741	0.00946	0.08167	0.00152		0.015303	506.009	9.79483	14.0839
Coltan139-45	154.664	64.49	1716.12	0.037579		12.1714	0.26073	0.05924	0.00176	0.67102	0.01662	0.08216	0.00176		0.229376	507.88	11.3407	15.2246
Coltan139-46	169.707	59.09	1623.83	0.0363893		12.1996	0.220268	0.05988	0.00106	0.67684	0.00774	0.08197	0.00148		0.308115	506.366	9.53716	13.9111
Coltan139-47	165.948	62.89	1685.46	0.0373133		12.1803	0.225506	0.06131	0.00118	0.69423	0.0093	0.0821	0.00152		0.484049	506.277	9.79483	14.0878
Coltan139-48	161.243	64.67	1727.24	0.0374412		12.1256	0.232308	0.05711	0.0011	0.64955	0.00874	0.08247	0.00158		0	511.01	10.1813	14.4261
Coltan139-49	167.549	74.29	1752.62	0.042388		12.1551	0.230484	0.05798	0.0011	0.65777	0.00848	0.08227	0.00156		0.0743576	509.294	10.0525	14.311
Coltan139-50	167.496	67.47	1741.85	0.0387347		12.0395	0.22902	0.06104	0.00118	0.69926	0.00936	0.08306	0.00158		0.450831	512.133	10.1813	14.442
Coltan139-51	166.198	71.8	1732.09	0.0414528		12.2745	0.235033	0.05824	0.00112	0.65441	0.00866	0.08147	0.00156		0.106346	504.375	10.0525	14.2411
Coltan139-52	173.201	68.49	1873.83	0.0365508		12.4162	0.237409	0.06208	0.00118	0.68966	0.00888	0.08054	0.00154		0.578782	496.564	9.92366	14.0396
Coltan139-53	169.578	73.19	1780.49	0.0411067		12.1507	0.230316	0.05801	0.0011	0.65842	0.00864	0.0823	0.00156		0.0780485	509.454	10.0525	14.3133
Coltan139-54	167.179	75.03	1768.18	0.0424335		12.2594	0.22544	0.05757	0.00114	0.64726	0.00882	0.08157	0.0015		0.0239152	505.371	9.666	13.9854
Coltan139-55	165.075	67.18	1780.2	0.0377373		12.1551	0.274808	0.05794	0.00196	0.65697	0.01902	0.08227	0.00186		0.0694364	509.318	11.9848	15.7288
Coltan139-56	175.934	65.73	1785.9	0.036805		11.976	0.218007	0.06629	0.00122	0.76284	0.0093	0.0835	0.00152		1.09674	511.529	9.79483	14.1635
Coltan139-57	164.934	66.16	1762.5	0.0375376		12.3411	0.2315	0.05669	0.00118	0.63307	0.00942	0.08103	0.00152		0	502.675	9.79483	14.0361
Coltan139-58	161.925	60.42	1692.35	0.0357018		12.0149	0.262731	0.06292	0.00182	0.72161	0.01702	0.08323	0.00182		0.682128	511.994	11.7271	15.5686
Coltan139-59	160.454	63.36	1707.36	0.0371099		12.2474	0.227998	0.05835	0.00116	0.65647	0.00914	0.08165	0.00152		0.119879	505.381	9.79483	14.0749
Coltan17-01	73.5961	8.11	741.87	0.0109318		12.1002	0.22548	0.07745	0.00178	0.877266	0.0147	0.082643	0.00154		2.48315	499.649	9.92366	14.0833
Coltan17-02	175.056	10.91	836.66	0.0130399		12.2598	0.23447	0.06165	0.0017	0.689139	0.01506	0.0815677	0.00156		0.538823	502.853	10.0525	14.2196
Coltan17-03	63.0613	1.427	541.24	0.00263654		12.1818	0.216658	0.07437	0.0015	0.83668	0.0113	0.0820897	0.00146		2.10413	498.286	9.40833	13.7052
Coltan17-04	79.7598	4.41	626.59	0.0070381		11.4494	0.204497	0.11327	0.0022	1.35592	0.01674	0.087341	0.00156		6.89112	504.01	10.0525	14.236
Coltan17-05	128.132	19.22	630.26	0.0304954		11.5795	0.20649	0.11288	0.00214	1.336	0.01602	0.0863597	0.00154		6.84313	498.808	9.92366	14.0713
Coltan17-06	166.539	15.48	1035.21	0.0149535		10.9349	0.186534	0.14852	0.0026	1.82067	0.01856	0.0914499	0.00156		11.2289	503.169	10.0525	14.2241
Coltan17-07	60.7459	4.31	673.08	0.0064034		12.3499	0.234879	0.05767	0.00146	0.639927	0.01244	0.0809726	0.00154		0.0490488	501.689	9.92366	14.1123
Coltan17-08	61.0977	2.98	634.75	0.00469476		12.2904	0.241686	0.0579	0.00156	0.650317	0.0137	0.0813644	0.0016		0.0773524	503.887	10.3101	14.4173
Coltan17-09	57.988	2.034	606.11	0.00335583		12.25	0.231097	0.05847	0.00136	0.662078	0.01138	0.0816326	0.00154		0.147496	505.143	9.92366	14.1614
Coltan17-10	57.0966	1.75	623.7	0.00280584		12.1663	0.233871	0.06648	0.00166	0.748689	0.01422	0.0821941	0.00158		1.1332	503.655	10.1813	14.3222
Coltan17-11	54.8122	1.66	601.14	0.00276142		12.2498	0.240091	0.05931	0.00156	0.669936	0.01368	0.0816342	0.0016		0.250865	504.649	10.3101	14.428
Coltan17-12	304.409	10.55	1393.83	0.00756907		10.6594	0.197704	0.167	0.0029	2.26608	0.02276	0.0938138	0.00174		13.5031	502.96	11.2119	15.063
Coltan17-13	265.596	8.89	1851.35	0.0048019		10.9307	0.205505	0.16021	0.00326	2.00798	0.0264	0.0914857	0.00172		12.6675	495.507	11.0831	14.8676
Coltan17-14	168.058	4.77	1250.53	0.00381438		11.7745	0.438098	0.1008	0.00684	1.17282	0.06834	0.0849294	0.00316		5.35657	498.391	20.3546	22.6642
Coltan17-15	178.043	13.27	1743.93	0.00760925		10.4757	0.208507	0.17836	0.004	2.28383	0.03444	0.0954589	0.0019		14.901	503.487	12.2424	15.8517
Coltan17-16	278.645	18.27	1588.44	0.0115019		10.8813	0.187075	0.15816	0.00268	1.96958	0.01892	0.0919011	0.00158		12.4152	499.055	10.1813	14.2577
Coltan17-17	243.638	44.04	2429.54	0.0181269		10.807	0.189201	0.16101	0.0029	1.99047	0.02146	0.0925329	0.00162		12.7659	500.42	10.439	14.4617
Coltan17-18	63.5988	11.91	863.53	0.0137922		11.7777	0.221942	0.09825	0.00216	1.12942	0.01728	0.0849063	0.0016		5.04277	499.85	10.3101	14.361
Coltan17-19	60.4175	1.607	596.42	0.00269441		12.134	0.229683	0.07749	0.00174	0.874982	0.01418	0.0824134	0.00156		2.48807	498.288	10.0525	14.1552
Coltan17-20	351.835	25.39	1719.65	0.0147646		10.847	0.1859	0.16058	0.0028	1.98421	0.02014	0.0921912	0.00158		12.713	498.933	10.1813	14.256
Coltan17-21	58.5705	4.97	632.82	0.00785373		12.3089	0.227265	0.05773	0.00136	0.634571	0.01124	0.0812418	0.0015		0.0564324	503.258	9.666	13.9549
SN3-01	58.9545	1.369	783.59	0.00174709		15.6421	0.308291	0.05495	0.00134	0.48408	0.00932	0.06393	0.00126		0.0187823	399.409	8.11992	11.3905
SN3-02	43.735	0.654	578.08	0.00113133		15.5594	0.348615	0.05484	0.00186	0.48563	0.01406	0.06427	0.00144		0.00516906	401.521	9.2795	12.2718
SN3-03	43.6146	0.673	591.77	0.00113727		15.4226	0.332998	0.0555	0.00174	0.49586	0.0132	0.06484	0.0014		0.0868485	404.652	9.02182	12.1198
SN3-04	59.9263	1.103	838.52	0.00131541		15.3681	0.325925	0.05377	0.00158	0.48213	0.01186	0.06507	0.00138		0	406.886	8.89298	12.0544
SN3-05	62.2444	0.984	774.29	0.00127084		15.3917	0.2985	0.05689	0.00128	0.50931	0.00866	0.06497	0.00126		0.25887	404.762	8.11992	11.4659
SN3-06	49.7476	0.817	685.94	0.00119107		15.3327	0.329129	0.05949	0.00174	0.53462	0.01302	0.06522	0.0014		0.580638	405.001	9.02182	12.1245
SN3-07	52.0823	0.817	734.21	0.00111276		15.4273	0.318924	0.05412	0.00148	0.48348	0.01092	0.06482	0.00134		0	405.201	8.6353	11.8425
SN3-08	43.6336	0.615	604.85	0.00101678		15.3421	0.31541	0.05725	0.00156	0.51432	0.01138	0.06518	0.00134		0.303423	405.854	8.6353	11.8514
SN3-09	41.6079	0.648	580.15	0.00111695		15.4392	0.324184	0.05396	0.00154	0.48171	0.0115	0.06477	0.00136		0	404.976	8.76414	11.9337
SN3-10	38.6103	0.501	533.05	0.000939874		15.3704	0.316575	0.0551	0.0015	0.49408	0.01108	0.06506	0.00134		0.0373458	406.178	8.6353	11.8558
SN3-11	44.7115	0.686	613.22	0.00111868		15.361	0.311467	0.05492	0.00144	0.49278	0.01054	0.0651	0.00132		0.0150696	406.508	8.50646	11.7669
SN3-12	41.0286	0.624	569.74	0.00109524		15.4751	0.32569	0.05536	0.0016	0.49316	0.0118	0.06462	0.00136		0.0695226	403.389	8.76414	11.9121
SN3-13	43.8963	0.652	597.09	0.00109196		15.3633	0.311563	0.05629	0.00148	0.50506	0.01078	0.06509	0.00132		0.184616	405.779	8.50646	11.7568
SN3-14	52.1572	0.795	713.82	0.00111373		15.4727	0.311225	0.05444	0.00142	0.48501	0.01016	0.06463	0.0013		0	403.895	8.37762	11.6377
SN3-15	71.6964	1.309	1004.09	0.00130367		15.3965	0.303425	0.05574	0.00132	0.49915	0.00928	0.06495	0.00128		0.11655	405.201	8.24877	11.5636
SN3-16	60.4067	1.038	864.89	0.00120015		15.3563	0.315992	0.05458	0.0015	0.49004	0.011	0.06512	0.00134		0	406.794	8.6353	11.8643
SN3-17	56.7466	1.012	810.24	0.00124901		15.3846	0.31716	0.05463	0.0015	0.48957	0.01106	0.065	0.00134		0	406.044	8.6353	11.854
SN3-18	41.4895	0.701	600.41	0.00116754		15.3775	0.335785	0.05692	0.00172	0.51041	0.01296	0.06503	0.00142		0.262583	405.11	9.15066	12.2221
SN3-19	48.9737	0.756	659.77	0.00114585		15.4178	0.304268	0.05409	0.00136	0.48371	0.00968	0.06486	0.00128		0	405.458	8.24877	11.5672
SN3-20	55.1182	0.887	781.63	0.00113481		15.3539	0.315895	0.05384	0.00152	0.4835	0.01126	0.06513	0.00134		0	407.216	8.6353	11.8701
SN3-21	42.4224	0.656	599.9	0.00109352		15.5788	0.34463	0.05428	0.00184	0.48046	0.01406	0.06419	0.00142		0	401.306	9.15066	12.1718
SN3-22	57.9201	0.886	793.34	0.0011168		15.2191	0.440083	0.05477	0.00212	0.506727	0.02	0.0657067	0.0019		-0.00349391	410.252	12.2424	14.7376
SN3-23	56.6072	0.881	771.39	0.00114209		15.4857	0.623502	0.05512	0.00336	0.511595	0.03312	0.0645755	0.0026		0.039821	403.236	16.7498	18.5902
SN3-24	55.6552	0.85	777.84	0.00109277		15.5645	0.503889	0.05372	0.00236	0.516746	0.02318	0.0642487	0.00208		0	401.932	13.4016	15.6276
SN3-25	53.3447	0.818	747.69	0.00109404		15.3292	0.573363	0.05525	0.00308	0.517349	0.03026	0.0652349	0.00244		0.0559093	407.163	15.7197	17.7037
SN3-26	46.7458	0.667	658.32	0.00101319		15.291	0.579858	0.06091	0.0032	0.532151	0.03122	0.0653981	0.00248		0.756373	405.377	15.9772	17.9166
SN3-27	55.6999	0.852	756.95	0.00112557		15.4968	0.268968	0.0545	0.00124	0.481645	0.0076	0.0645296	0.00112		0	403.258	7.21796	10.8234
SN3-28	52.638	0.821	755.59	0.00108657		15.2695	0.387042	0.05775	0.00238	0.52108	0.0189	0.06549	0.00166		0.365301	407.479	10.6966	13.4474
SN3-29	58.4671	0.926	833.34	0.00111119		15.4131	0.508384	0.05465	0.00342	0.48853	0.02774	0.06488	0.00214		0	405.307	13.788	15.9943
Zkw-01	42.9293	5	972.8	0.0051398		31.8674	0.832737	0.05063	0.00244	0.21905	0.00956	0.03138	0.00082		0.0599656	199.062	5.28498	6.61674
Zkw-02	9.33939	1.55	204.48	0.0075802		30.7977	0.720857	0.0543	0.00192	0.24309	0.00748	0.03247	0.00076		0.519457	204.935	4.89834	6.38695
Zkw-03	9.80095	1.74	288.76	0.00602577		30.828	0.855331	0.05963	0.00254	0.27217	0.01008	0.032438	0.0009		1.18678	203.385	5.80047	7.0846
Zkw-04	11.0879	1.71	314.58	0.00543582		30.5998	0.805257	0.05929	0.00248	0.26716	0.00976	0.03268	0.00086		1.14422	204.965	5.54272	6.89391
Zkw-05	17.7897	2.13	462.09	0.00460949		31.3578	0.668652	0.05103	0.0014	0.22431	0.0051	0.03189	0.00068		0.110046	202.147	4.38282	5.96276
Zkw-06	5.707	1.207	160.16	0.00753621		31.8878	1.09818	0.05025	0.00378	0.21721	0.01518	0.03136	0.00108		0.0123888	199.03	6.96025	8.01812
Zkw-07	180.365	43.71	5668.76	0.00771068		31.25	0.78125	0.04864	0.00196	0.21453	0.00764	0.032	0.0008		0	203.432	5.1561	6.56804
Zkw-08	5.14506	1.115	142.06	0.0078488		30.9693	1.28519	0.0498	0.00456	0.22164	0.01876	0.03229	0.00134		0	204.953	8.6353	9.55881
Zkw-09	1.92841	0.195	43.4	0.00449309		31.4961	1.01184	0.0501	0.00372	0.21927	0.01516	0.03175	0.00102		0	201.504	6.57367	7.71069
Zkw-10	133.32	20.8	2974.79	0.00699209		31.0849	0.618412	0.05379	0.00094	0.23854	0.00282	0.03217	0.00064		0.455604	203.2	4.12505	5.79069
Zkw-11	30.9313	6.55	886.9	0.00738527		30.959	0.69009	0.05958	0.00156	0.27073	0.00572	0.0323008	0.00072		1.18052	202.55	4.64058	6.16001
Zkw-12	35.3138	4.96	909.14	0.00545571		31.1236	0.6587	0.04894	0.00128	0.21677	0.0047	0.03213	0.00068		0	204.17	4.38282	5.99026
Zkw-13	23.2897	4.13	663.58	0.00622382		31.407	0.729937	0.05063	0.00176	0.22224	0.00672	0.03184	0.00074		0.0599656	201.935	4.76946	6.24971
Zkw-14	12.2424	1.044	309.45	0.00337373		31.4268	0.711102	0.05144	0.0016	0.22559	0.00598	0.03182	0.00072		0.161379	201.608	4.64058	6.14763
Zkw-15	4.31414	0.585	104.16	0.00561636		31.1333	0.775423	0.05061	0.00228	0.22406	0.00914	0.03212	0.0008		0.0574615	203.688	5.1561	6.57121
Zkw-16	3.85788	0.43	93.55	0.00459647		31.7158	0.804715	0.05122	0.00234	0.22258	0.0092	0.03153	0.0008		0.133835	199.853	5.1561	6.52395
Zkw-17	3.79528	0.834	100.4	0.00830677		31.8776	1.09748	0.05003	0.00366	0.21631	0.01448	0.03137	0.00108		0	199.147	6.96025	8.01928
Zkw-18	3.54956	0.658	91.07	0.00722521		31.736	0.88631	0.0501	0.00286	0.2176	0.01144	0.03151	0.00088		0	200.005	5.6716	6.9403
Zkw-19	7.49919	1.75	240.39	0.00727984		31.0463	1.17592	0.05477	0.0043	0.24312	0.0174	0.03221	0.00122		0.578302	203.202	7.86223	8.85048
Zkw-20	3.70983	1.3	99.09	0.0131194		31.5159	0.953523	0.05077	0.00274	0.22201	0.01066	0.03173	0.00096		0.0774939	201.213	6.18707	7.38069
Zkw-21	3.14719	0.556	80.09	0.00694219		31.2891	0.939848	0.04954	0.0036	0.2182	0.0149	0.03196	0.00096		0	202.956	6.18707	7.39976
Zkw-22	21.2732	2.69	502.25	0.0053559		31.0078	0.673036	0.05413	0.00152	0.24062	0.0056	0.03225	0.0007		0.498173	203.611	4.5117	6.0777
Zkw-23	38.1064	4.76	972.17	0.00489626		30.8642	0.685871	0.04936	0.00146	0.22047	0.00556	0.0324	0.00072		0	205.752	4.64058	6.2023
Zkw-24	252.54	27.89	6680.16	0.00417505		31.3775	0.708873	0.05223	0.00162	0.22938	0.00602	0.03187	0.00072		0.260289	201.723	4.64058	6.14914
DDB-01	6.03001	0.93	159.05	0.00584722		31.0463	0.867483	0.04984	0.00282	0.22134	0.01146	0.03221	0.0009		0	204.443	5.80047	7.09678
DDB-02	4.14594	0.569	107.35	0.00530042		31.9285	0.958262	0.05123	0.00352	0.22127	0.01414	0.03132	0.00094		0.135087	198.54	6.05821	7.24356
DDB-03	108.085	25.32	3249.46	0.00779206		31.3283	0.608507	0.05124	0.00114	0.22555	0.0038	0.03192	0.00062		0.136339	202.282	3.99616	5.68651
DDB-04	167.175	69.82	5690.65	0.0122692		30.5415	0.615636	0.06141	0.00144	0.27896	0.005	0.0327424	0.00066		1.40964	204.807	4.25393	5.90545
DDB-05	11.2741	1.98	305.02	0.00649138		31.1236	0.833061	0.05325	0.00256	0.23596	0.01006	0.03213	0.00086		0.387995	203.087	5.54272	6.87164
DDB-06	27.1489	4.65	498.89	0.00932069		29.8604	0.641984	0.08726	0.0021	0.41967	0.00762	0.0334891	0.00072		4.64612	202.636	4.64058	6.16113
DDB-07	75.4592	15.43	2239.57	0.00688972		31.1429	0.698316	0.04965	0.00172	0.21989	0.00658	0.03211	0.00072		0	203.866	4.64058	6.17735
DDB-08	49.4839	11.4	1327.04	0.00859055		31.8573	0.629229	0.0509	0.00126	0.22037	0.00434	0.03139	0.00062		0.0937701	199.058	3.99616	5.64082
DDB-09	42.1076	10.51	1072.06	0.00980356		31.2402	0.62461	0.05314	0.0013	0.23461	0.0045	0.03201	0.00064		0.374223	202.368	4.12505	5.77902
DDB-10	19.3184	4.77	595.81	0.00800591		31.3087	0.862607	0.05141	0.0026	0.22644	0.01026	0.03194	0.00088		0.157623	202.364	5.6716	6.9676
DDB-11	26.6409	6.7	834.99	0.00802405		31.6156	0.959562	0.05007	0.003	0.21842	0.01182	0.03163	0.00096		0	200.762	6.18707	7.37577
DDB-12	110.815	29.1	3270.5	0.00889772		31.2012	0.603581	0.05375	0.0012	0.23763	0.00402	0.03205	0.00062		0.450596	202.464	3.99616	5.6891
DDB-13	45.3302	8.51	1032.01	0.00824604		31.5159	0.595952	0.04973	0.00108	0.21767	0.00358	0.03173	0.0006		0	201.471	3.86727	5.58498
DDB-14	73.1636	15.47	1642.25	0.00942		31.1139	0.580844	0.0523	0.00106	0.23184	0.00332	0.03214	0.0006		0.269053	203.388	3.86727	5.6127
DDB-15	5.63101	1.072	162.64	0.00659124		31.1236	1.04617	0.05216	0.00364	0.23117	0.01476	0.03213	0.00108		0.251525	203.361	6.96025	8.06147
DDB-16	18.8412	4.55	619.06	0.00734985		31.506	1.09189	0.05214	0.00374	0.22833	0.01492	0.03174	0.0011		0.249021	200.935	7.08911	8.14895
DDB-17	122.33	64.83	3730.96	0.0173762		31.5259	0.65596	0.04907	0.00148	0.21472	0.0054	0.03172	0.00066		0	201.572	4.25393	5.86076
DDB-18	146.249	46.17	3956.07	0.0116707		31.3873	0.591098	0.05226	0.0012	0.22975	0.004	0.03186	0.0006		0.264045	201.653	3.86727	5.58761
DDB-19	130.699	40.58	3212.59	0.0126316		31.736	0.624446	0.05084	0.00128	0.22102	0.0044	0.03151	0.00062		0.086258	199.822	3.99616	5.65162
HND-01	27.3778	17.91	946.95	0.0189134		45.7875	0.92246	0.05735	0.00152	0.17276	0.00376	0.02184	0.00044		1.08035	137.786	2.83611	3.95442
HND-02	23.468	17.53	978.34	0.0179181		46.5116	0.995133	0.05071	0.00172	0.15036	0.00438	0.0215	0.00046		0.245867	136.795	2.96501	4.03441
HND-03	28.9011	17.39	966.58	0.0179913		45.7457	0.920773	0.06027	0.00138	0.18172	0.00316	0.02186	0.00044		1.44732	137.404	2.83611	3.94911
HND-04	34.2789	24.46	1263.7	0.0193559		46.2107	0.896881	0.05436	0.00124	0.16224	0.00286	0.02164	0.00042		0.704582	137.05	2.70721	3.85254
HND-05	37.75	26.75	1405.87	0.0190274		46.2749	0.899373	0.05244	0.00118	0.15629	0.0027	0.02161	0.00042		0.463285	137.191	2.70721	3.85455
HND-06	26.7452	22.34	1098.42	0.0203383		46.7946	0.963482	0.04719	0.00136	0.13909	0.00332	0.02137	0.00044		0	136.574	2.83611	3.93757
HND-07	29.1762	24.16	1196.3	0.0201956		46.9263	1.01296	0.04903	0.00152	0.14407	0.00376	0.02131	0.00046		0.0347322	135.883	2.96501	4.02206
HND-08	26.7164	22.52	1071.67	0.0210139		47.1058	1.02072	0.04774	0.0016	0.1409	0.00406	0.0212288	0.00046		0	135.588	2.96501	4.01807
HND-09	29.328	20.89	1155.87	0.018073		46.6913	0.959233	0.05242	0.0014	0.15607	0.00336	0.0214173	0.00044		0.460772	135.984	2.83611	3.9294
HND-10	31.1155	20.99	1181.3	0.0177686		46.6481	1.00098	0.05568	0.00154	0.16589	0.00376	0.0214371	0.00046		0.870473	135.554	2.96501	4.01762
HND-11	20.4988	15.69	341.56	0.0459363		45.8877	1.13707	0.06358	0.00256	0.19456	0.00676	0.0217924	0.00054		1.86331	136.411	3.48059	4.42242
HND-12	21.5979	14.63	857.77	0.0170559		46.7997	1.0513	0.05389	0.00188	0.16011	0.0048	0.0213677	0.00048		0.645514	135.423	3.09391	4.11194
HND-13	27.5532	14.63	884.96	0.0165318		46.2415	0.940841	0.05312	0.00146	0.15972	0.00358	0.0216256	0.00044		0.548744	137.173	2.83611	3.94589
HND-14	33.9373	25.82	1309.24	0.0197214		47.0399	0.929355	0.04894	0.00124	0.14467	0.00296	0.0212586	0.00042		0.0234214	135.574	2.70721	3.83159
HND-15	38.7976	23.52	1249.09	0.0188297		46.9799	0.926985	0.05249	0.00122	0.15741	0.0028	0.0212857	0.00042		0.469569	135.146	2.70721	3.82554
HND-16	35.3973	21.67	1199.72	0.0180625		46.0114	0.931502	0.0598	0.00138	0.18161	0.00318	0.0217337	0.00044		1.38826	136.7	2.83611	3.93932
HND-17	23.1895	12.49	349.65	0.0357214		45.872	1.13629	0.06288	0.00244	0.19344	0.0065	0.0217998	0.00054		1.77534	136.578	3.48059	4.42448
HND-18	55.996	26.83	1158.39	0.0231615		44.8478	0.965438	0.07786	0.002	0.25006	0.005	0.0222976	0.00048		3.65795	137.015	3.09391	4.13298
HND-19	45.8776	28.88	1245.11	0.0231947		46.2424	0.940879	0.05731	0.00148	0.1732	0.00354	0.0216252	0.00044		1.07532	136.451	2.83611	3.93588
HND-20	29.1726	21.07	1149.21	0.0183343		46.7071	0.959885	0.04967	0.00134	0.14665	0.00324	0.02141	0.00044		0.115164	136.405	2.83611	3.93524
HND-21	33.0754	24.95	1332.32	0.0187267		46.8823	0.967099	0.04972	0.00134	0.14624	0.0032	0.02133	0.00044		0.121448	135.893	2.83611	3.92813
RL2-01	5.83908	4.61	228.76	0.0201521		47.1921	1.55896	0.0488	0.00372	0.14273	0.0101	0.02119	0.0007		0.00582684	135.165	4.5117	5.25958
RL2-02	5.45606	4.62	214.14	0.0215747		46.7071	1.35257	0.04859	0.00354	0.14358	0.0098	0.02141	0.00062		0	136.589	3.99616	4.84065
RL2-03	5.78227	4.4	219.83	0.0200155		46.6636	1.30649	0.04821	0.0035	0.14255	0.00978	0.02143	0.0006		0	136.78	3.86727	4.73701
RL2-04	6.41546	4.77	229.99	0.02074		45.9137	1.26484	0.05314	0.00324	0.1597	0.00896	0.02178	0.0006		0.551258	138.138	3.86727	4.75275
RL2-05	17.6023	13.15	498.03	0.026404		46.2963	1.11454	0.04723	0.00212	0.1408	0.00568	0.0216	0.00052		0	138.021	3.3517	4.3421
RL2-06	9.49743	8.67	342.31	0.0253279		46.7508	1.13653	0.04857	0.00244	0.14338	0.00654	0.02139	0.00052		0	136.466	3.3517	4.32239
RL2-07	9.22914	4.89	223.8	0.0218499		45.8505	1.51364	0.0611	0.00384	0.18636	0.01044	0.02181	0.00072		1.55163	136.95	4.64058	5.38861
RL2-08	6.58696	6.37	247.75	0.0257114		46.7946	1.22625	0.04975	0.00254	0.14665	0.00674	0.02137	0.00056		0.125218	136.14	3.60949	4.52128
RL2-09	5.22035	3.8	197.56	0.0192347		47.0146	1.54726	0.04833	0.0039	0.1391	0.01044	0.02127	0.0007		0	135.749	4.5117	5.2656
RL2-10	5.09713	3.81	202.27	0.0188362		46.3607	1.46153	0.05159	0.00416	0.15348	0.01162	0.02157	0.00068		0.356461	137.086	4.38282	5.16973
RL2-11	5.44942	4.5	213.79	0.0210487		46.3607	1.41855	0.04775	0.00352	0.14203	0.00976	0.02157	0.00066		0	137.742	4.25393	5.06805
RL2-12	7.05825	6.06	276.49	0.0219176		47.1032	1.24248	0.04946	0.00264	0.14485	0.00704	0.02123	0.00056		0.0887726	135.306	3.60949	4.51126
RL2-13	8.92819	6.17	259.12	0.0238114		45.683	1.21042	0.05814	0.00306	0.17551	0.00834	0.02189	0.00058		1.17963	137.961	3.73838	4.64637
RL2-14	21.3387	14.74	656.5	0.0224524		45.6621	1.04251	0.0591	0.0021	0.17844	0.00538	0.0219	0.0005		1.30028	137.856	3.2228	4.24125
RL2-15	5.40364	4.34	208.12	0.0208534		46.2963	1.32888	0.05164	0.00306	0.15377	0.0083	0.0216	0.00062		0.362745	137.266	3.99616	4.8483
RL2-16	8.87454	5.46	297.43	0.0183573		46.5333	1.21259	0.05165	0.00252	0.15299	0.00666	0.02149	0.00056		0.364002	136.572	3.60949	4.5265
RL2-17	6.40362	8.88	217.35	0.0408558		46.8384	1.36018	0.05016	0.00314	0.14764	0.0085	0.02135	0.00062		0.176745	135.944	3.99616	4.83338
RL2-18	38.1645	35.68	1211.92	0.0294409		46.3177	0.943947	0.05609	0.00138	0.17311	0.00338	0.02159	0.00044		0.922	136.441	2.83611	3.93573
RL2-19	20.6919	25.88	691.13	0.0374459		46.1467	0.97958	0.05164	0.00164	0.15425	0.0042	0.02167	0.00046		0.362745	137.706	2.96501	4.04678
RL2-20	8.93206	7.93	333.06	0.0238095		46.7508	1.18025	0.04788	0.00252	0.14116	0.00684	0.02139	0.00054		0	136.583	3.48059	4.42453
RL2-21	34.3206	20.18	1243.41	0.0162296		46.2749	0.985027	0.05615	0.00176	0.16724	0.00436	0.02161	0.00046		0.929541	136.555	2.96501	4.03116
Note:
Mass fraction's uncertainties are about 20%.
Decay constants of Jaffey et al. (1971) were used.
a Pb (μg g-1)= 204Pb (μg g-1) + 206Pb (μg g-1) +207Pb (μg g-1) +208Pb (μg g-1)
b f206, common 206Pb in total 206Pb; f206 (%) = [(207Pb/206Pb) measured - (207Pb/206Pb) radiogenic] / [(207Pb/206Pb) common - (207Pb/206Pb) radiogenic] . 100
c Total systematic uncertainties (ssys): 206Pb/238U = 2.0% (2s)
