# Supplementary material for: Characterization of reference materials for in situ U–Pb dating of columbite group minerals by LA-ICP-MS
Source: Royal Society of Chemistry journal article supplement (doi:10.1039/d3ja00162h), 2023-01-01
Supplement: d3ja00162h4.pdf [file d3ja00162h4.pdf]

## Supporting information

Table S1 Individual EPMA data of investigated CGM samples in this study (% m/m).

Table S2 Individual LA-ICP-MS trace elements data of investigated CGM samples in this study ( $\mu\text{g g}^{-1}$ ).

Table S3 Individual LA-ICP-MS U-Pb data of investigated CGM samples in this study.
